# Supplementary material for: Localized nuclear reaction breaks boron drug capsules loaded with immune adjuvants for cancer immunotherapy
Source: PubMed Central journal article supplement (PMC10076324; doi:10.1038/s41467-023-37253-x), 2023-04-05
Supplement: 41467_2023_37253_MOESM1_ESM.pdf [file 41467_2023_37253_MOESM1_ESM.pdf]

Supplementary Information for

## **Localized Nuclear Reaction Breaks Boron Drug Capsules Loaded with Immune Adjuvants for Cancer Immunotherapy**

*Yaxin Shi<sup>1,14</sup>, Zhibin Guo<sup>1,14</sup>, Qiang Fu<sup>2,14</sup>, Xinyuan Shen<sup>3</sup>, Zhongming Zhang<sup>4</sup>, Wenjia Sun<sup>5</sup>, Jinqiang Wang<sup>3</sup>, Junliang Sun<sup>5</sup>, Zizhu Zhang<sup>6</sup>, Tong Liu<sup>7</sup>, Zhen Gu<sup>3,8,9,10\*</sup>, Zhibo Liu<sup>1,11,12,13\*</sup>*

<sup>1</sup>Beijing National Laboratory for Molecular Sciences, Radiochemistry and Radiation Chemistry Key Laboratory of Fundamental Science, Key Laboratory of Bioorganic Chemistry and Molecular Engineering of Ministry of Education, College of Chemistry and Molecular Engineering, Peking University, Beijing 100871, China

<sup>2</sup>The Centre of Nanoscale Science and Technology and Key Laboratory of Functional Polymer Materials, Institute of Polymer Chemistry, College of Chemistry, Nankai University, Tianjin 300071, China

<sup>3</sup>Key Laboratory of Advanced Drug Delivery Systems of Zhejiang Province, College of Pharmaceutical Sciences, Zhejiang University, Hangzhou 310058, China;

<sup>4</sup>Engineering Department, Lancaster University, Lancaster, Lancashire, LA1 4YW, United Kingdom

<sup>5</sup>College of Chemistry and Molecular Engineering, Beijing National Laboratory for Molecular Sciences, Peking University, Beijing 100871, China

<sup>6</sup>Beijing Nuclear Industry Hospital, Beijing 100045, China

<sup>7</sup>Beijing Capture Tech Co. Ltd., Beijing 102413, China

<sup>8</sup>Jinhua Institute of Zhejiang University, Jinhua 321299, China

<sup>9</sup>Department of General Surgery, Sir Run Run Shaw Hospital, School of Medicine, Zhejiang University, Hangzhou 310016, China

<sup>10</sup>Liangzhu Laboratory, Zhejiang University Medical Center, Hangzhou 311121, China

<sup>11</sup>Peking-Tsinghua Center for Life Sciences, Peking University, Beijing 100871, China

<sup>12</sup>Changping Laboratory, Beijing 102206, China

<sup>13</sup>Key Laboratory of Carcinogenesis and Translational Research (Ministry of Education/Beijing), NMPA Key Laboratory for Research and Evaluation of Radiopharmaceuticals (National Medical Products Administration), Department of Nuclear Medicine, Peking University Cancer Hospital & Institute, Beijing 100142, China

<sup>14</sup>These authors contributed equally.

\*Corresponding authors, e-mails: guzhen@zju.edu.cn; zbliu@pku.edu.cn

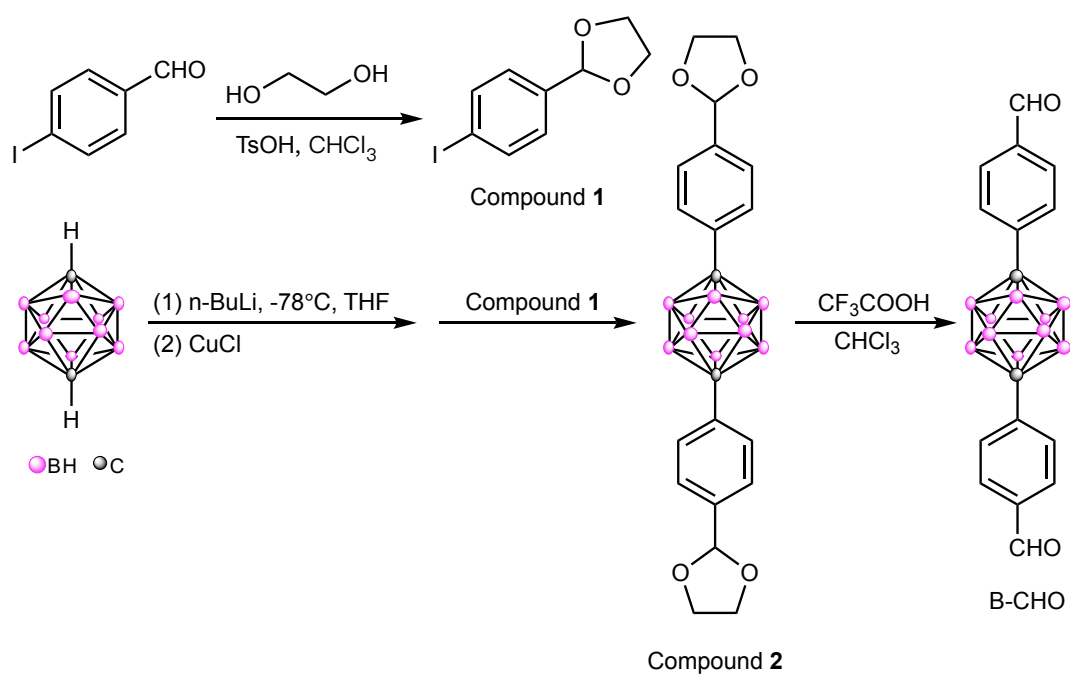

**Supplementary Figure 1. Synthesis route of monomer *p*-carborane-1,10-phenyl-dialdehyde (B-CHO)**

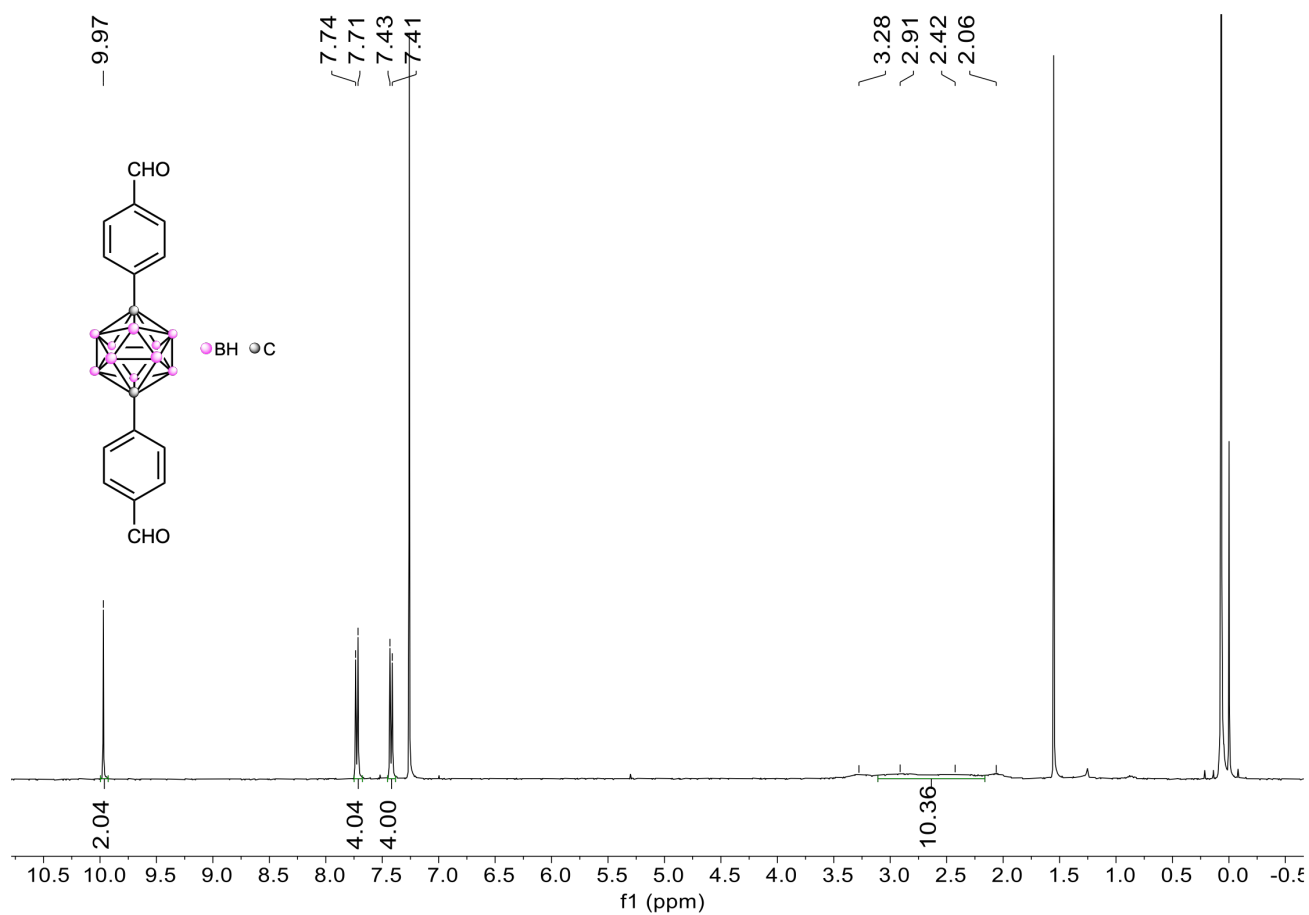

**Supplementary Figure 2.  $^1\text{H}$  NMR spectrum of B-CHO in  $\text{CDCl}_3$ .**

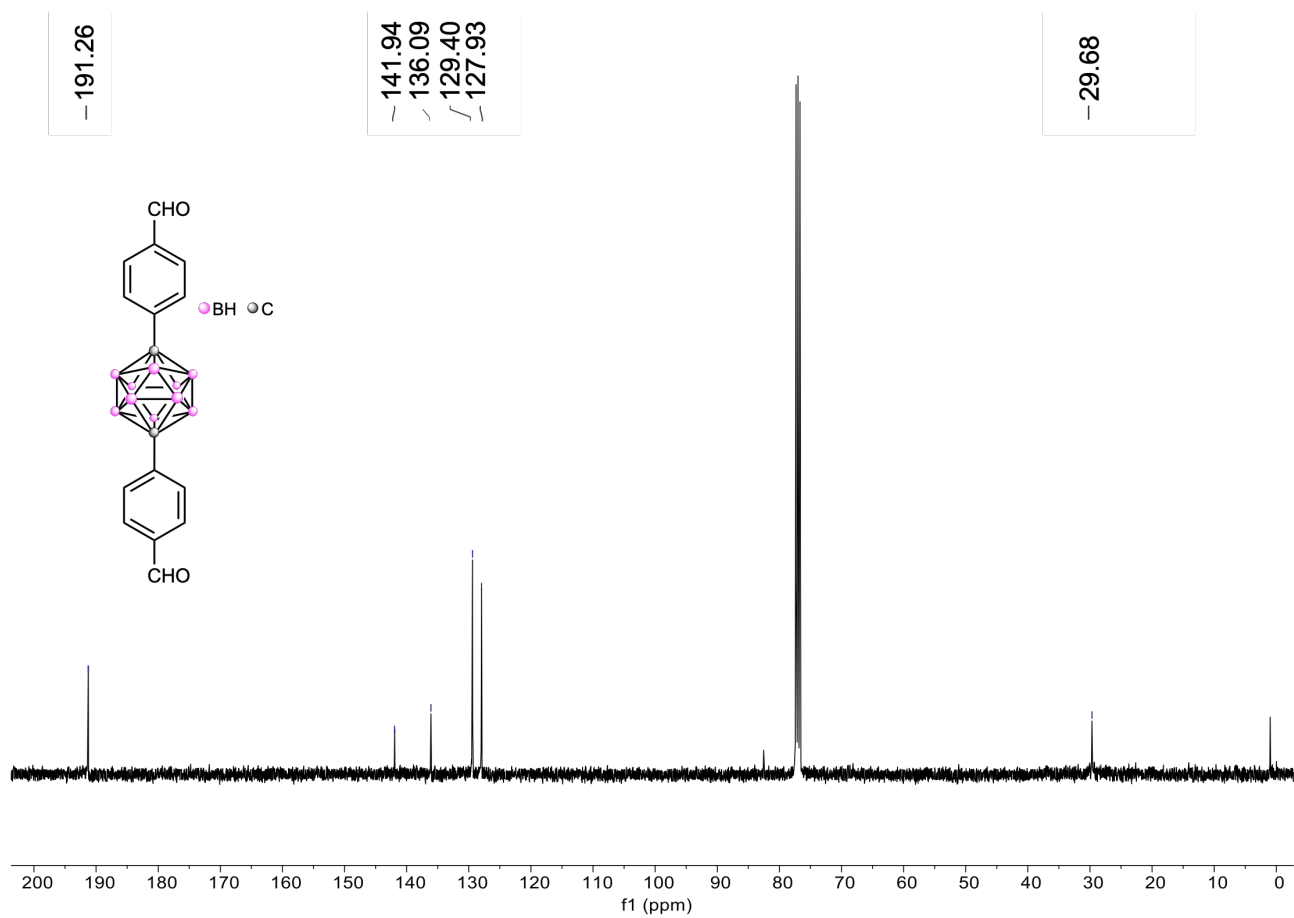

Supplementary Figure 3.  $^{13}\text{C}$  NMR spectrum of B-CHO in  $\text{CDCl}_3$ .



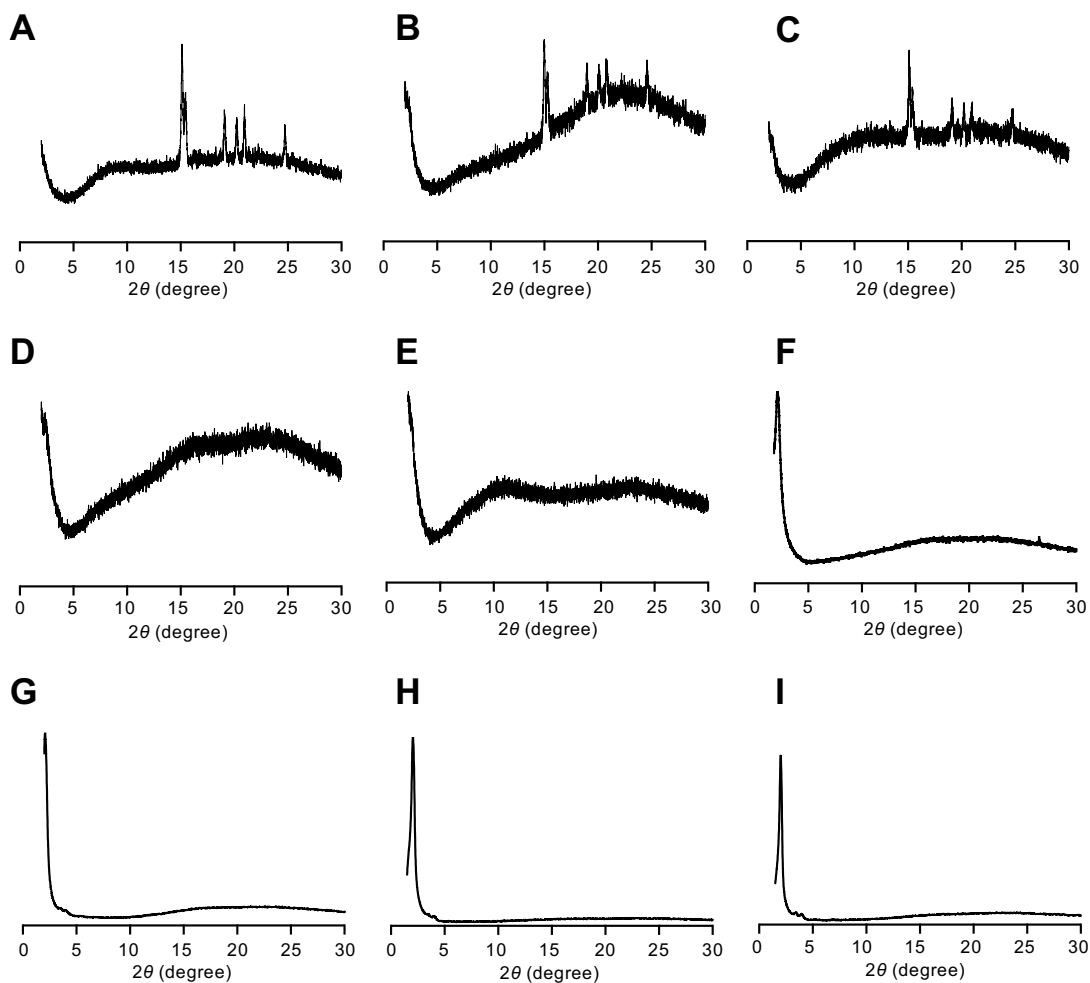

**Supplementary Figure 4. Powder X-ray diffraction (PXRD) of B-COF synthesized in different conditions.**

(A), Methanol. (B), Ethanol. (C), *n*-butanol. (D), Acetone. (E), Mesitylene. (F), *o*-dichlorobenzene. (G), *o*-dichlorobenzene, 37 °C. (H), *o*-dichlorobenzene, 50 °C. (I), *o*-dichlorobenzene, 50 °C with polystyrene microspheres. In brief, the organic linkers of TAPB and B-CHO in the molar ratio of 2:3 were added to different solvents (2.5 mL) containing HAc (0.15 mL, 12 M).

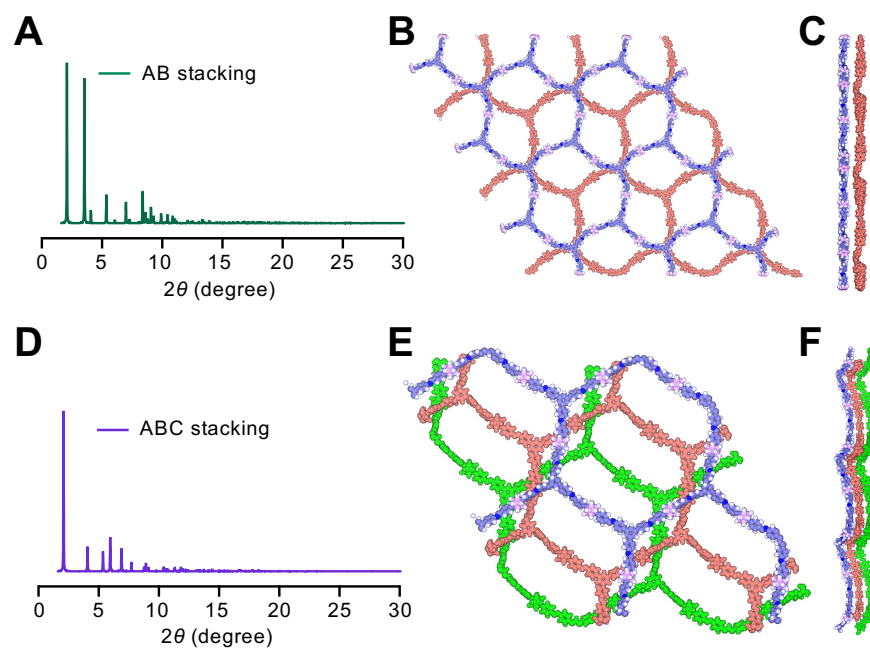

**Supplementary Figure 5. Simulated PXRD patterns and the staggered structure models (AB and ABC) of B-COF.**

(A, D), PXRD patterns of AB (A) and ABC (D) stacking mode. (B, C, E, F), The reconstructed structure of the AB (B, C) and ABC (E, F) stacking mode of B-COF at the top view and side view, respectively.

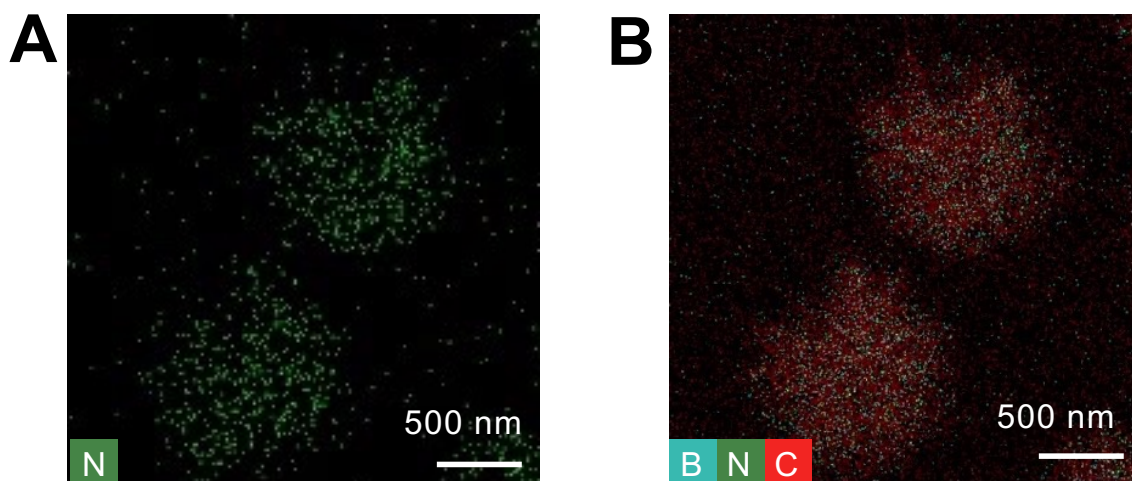

**Supplementary Figure 6. The corresponding energy dispersive spectroscopy (EDS) elemental mapping images of B-COF in Figure 1G.**

(A), The elemental mapping of N in B-COF (N as green,  $n = 3$  samples). (B), The elemental mapping of B-COF (C, B, N, merge,  $n = 3$  samples).

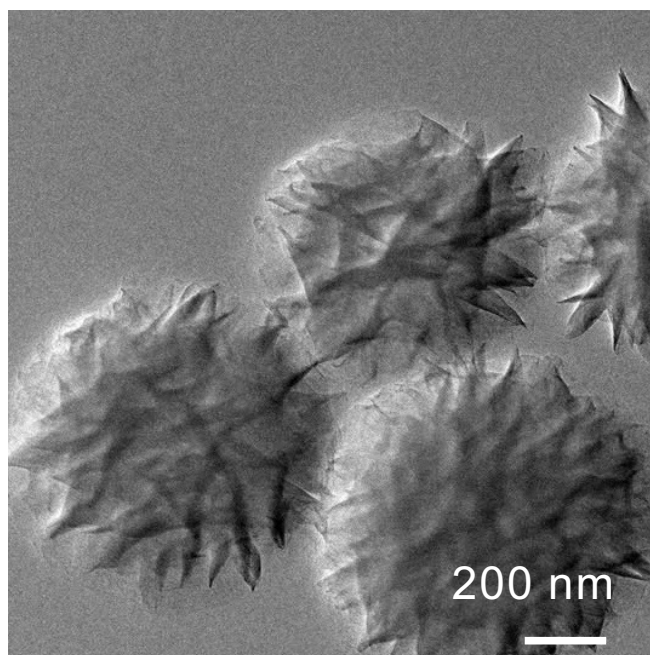

**Supplementary Figure 7. TEM imaging of imiquimod loaded B-COF.** The experiment was repeated three times independently (n = 3 samples) with similar results.

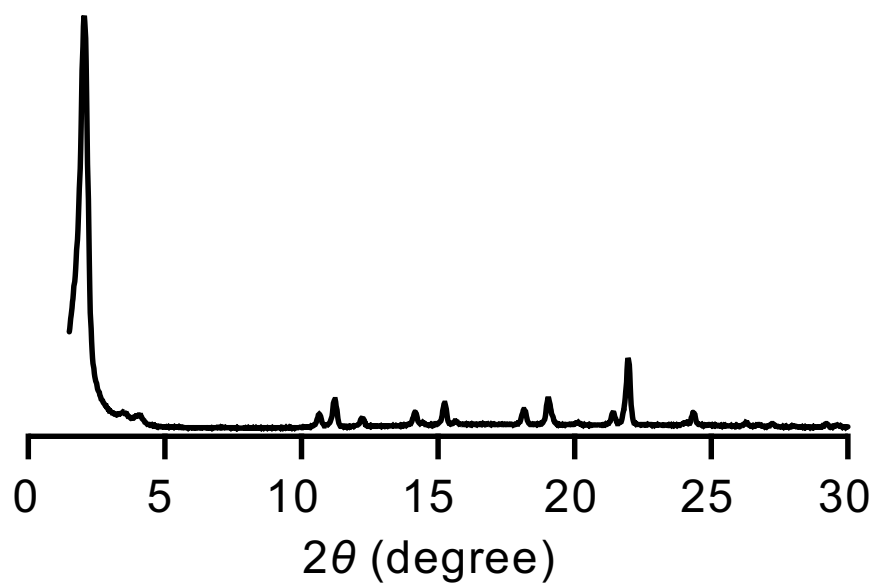

**Supplementary Figure 8. PXRD of imiquimod loaded B-COF.**

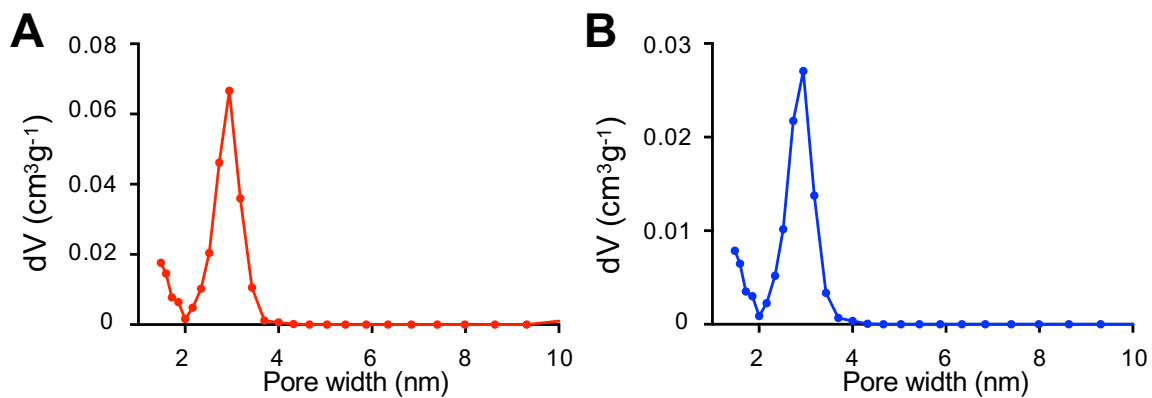

**Supplementary Figure 9. Pore size distributions from fitting the nonlocal density functional theory (NLDFT) model to the adsorption data of B-COF (A) and imiquimod loaded B-COF (B).**

The Brunauer-Emmett-Teller (BET) surface area of B-COF is  $673 \text{ m}^2 \text{ g}^{-1}$ , with a total pore volume of  $0.68 \text{ cm}^3 \text{ g}^{-1}$  (pore size, 2.95 nm). They were reduced to  $275 \text{ m}^2 \text{ g}^{-1}$  and  $0.31 \text{ cm}^3 \text{ g}^{-1}$  (pore size, 2.95 nm) after drug loading ( $n = 3$  samples), respectively.

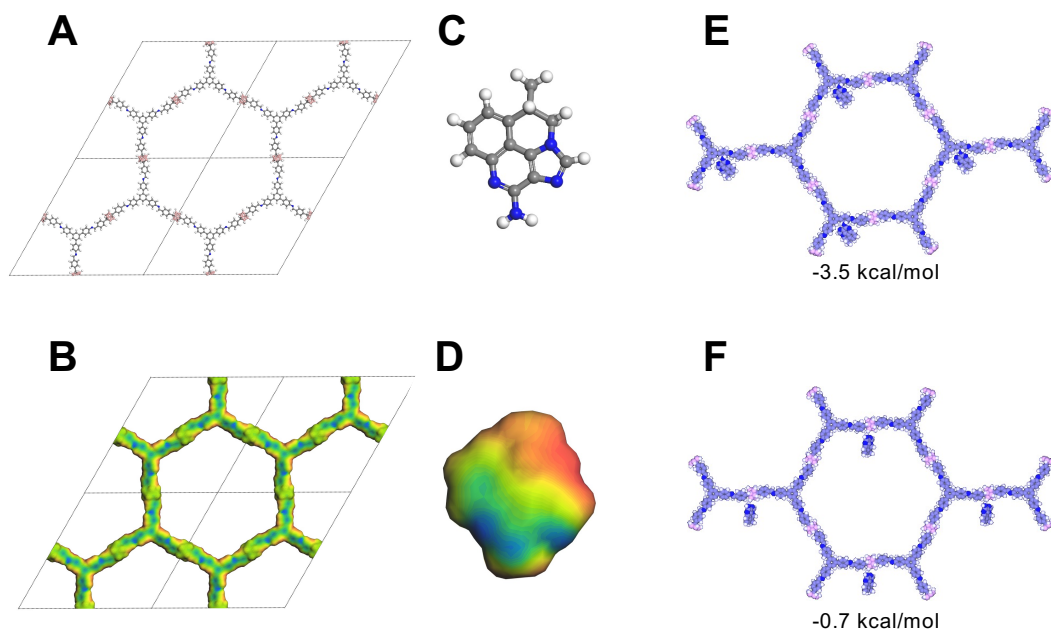

**Supplementary Figure 10. Theoretical simulation helps to further understand the binding site of payload in boron capsule.**

(A–D), Molecular structure and electrostatic potential map of (A, B) B-COF and (C, D) imiquimod. (E, F), Theoretical model and binding energy calculated by density functional theory (DFT) when imiquimod is adsorbed near the benzene ring unit (E) and the carborane unit (F), respectively.

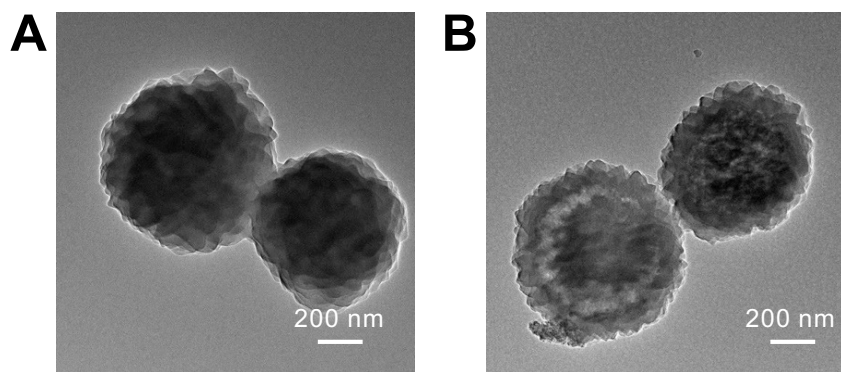

**Supplementary Figure 11. TEM imaging of boron capsule (A) and B-COF (B).** The experiments for A and B were repeated three times independently ( $n = 3$  samples) with similar results.



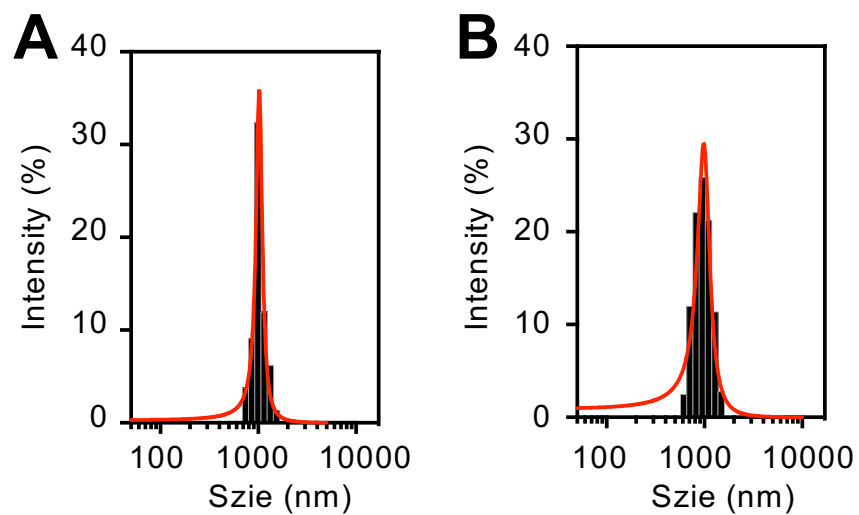

**Supplementary Figure 12. The hydrodynamic size of boron capsule in PBS (A) and serum (B) at 37 °C for 7 days ( $n = 3$  samples).**

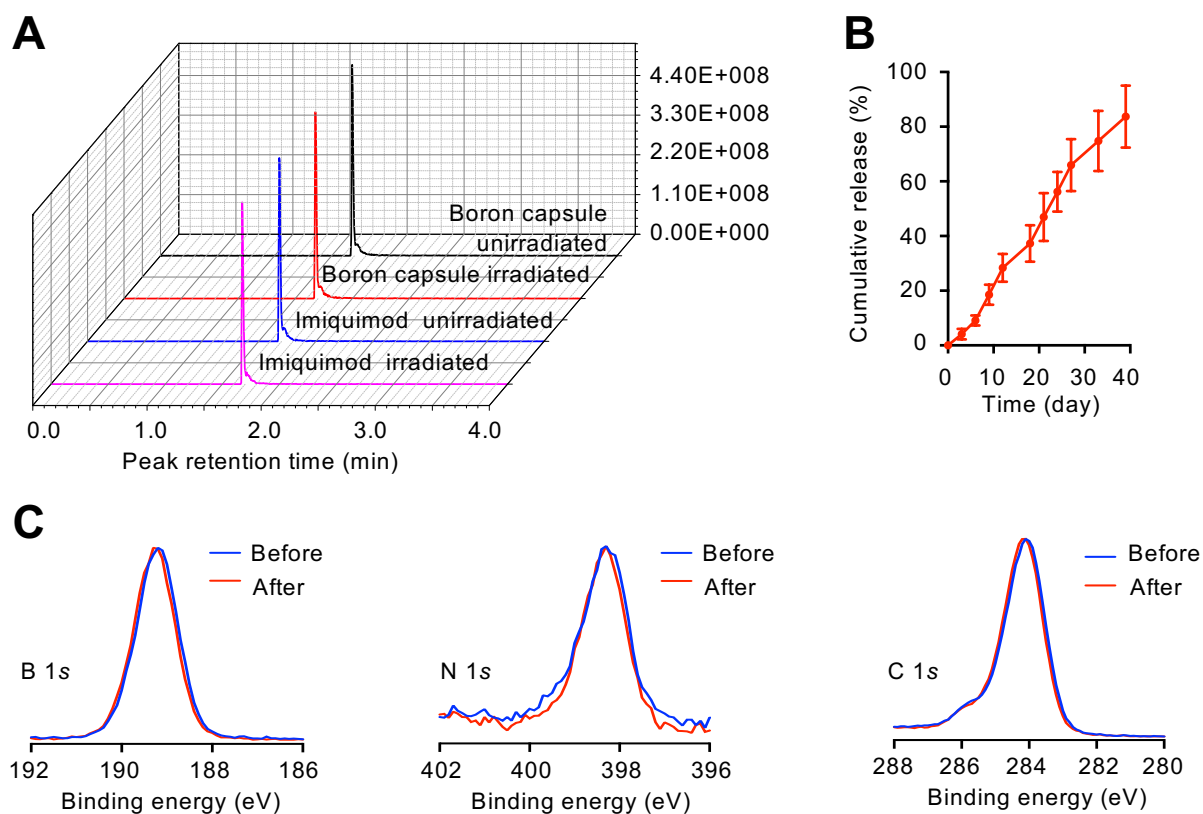

**Supplementary Figure 13. Boron neutron capture reaction affects neither the stability of imiquimod nor the major structure of boron capsule.**

(A), UPLC-MS analysis of imiquimod under the different condition with and without neutron irradiation. (B), Cumulative release profile of boron capsule after neutron irradiation. Data shown as mean  $\pm$  s.d. ( $n = 3$  independent experiments). (C), X-ray photoelectron spectroscopy (XPS) spectrum shows that the chemical state of boron, nitrogen and carbon element in B-COF has no significant change before (blue) and after (red) neutron irradiation, respectively.

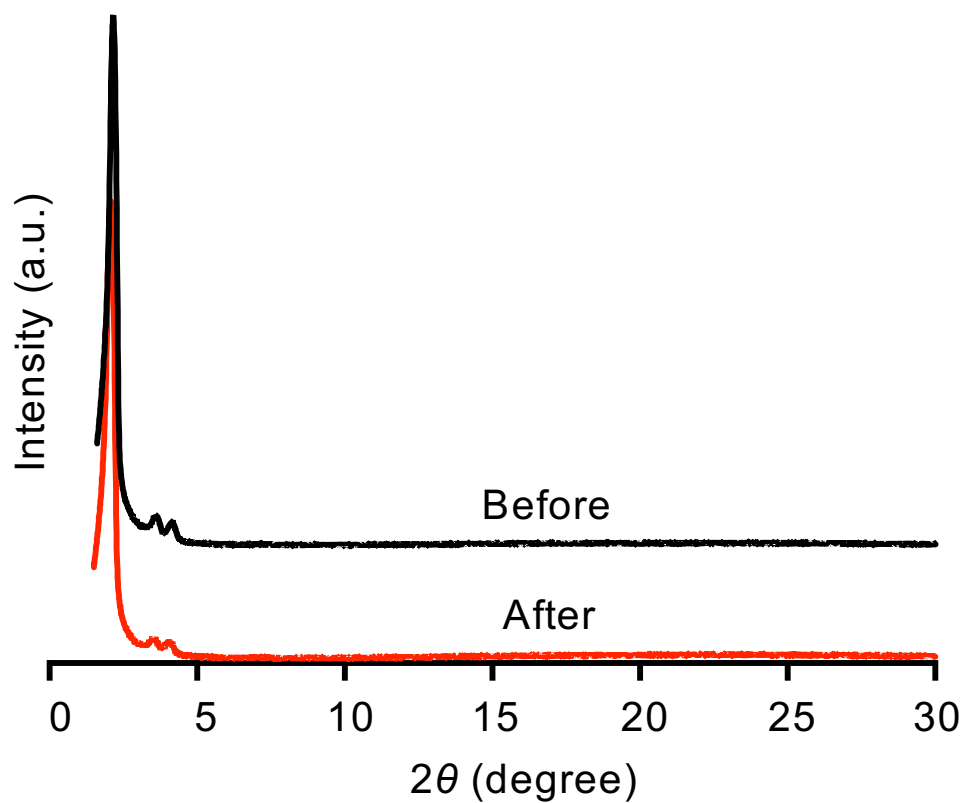

**Supplementary Figure 14. PXRD of B-COF before and after neutron irradiation.**

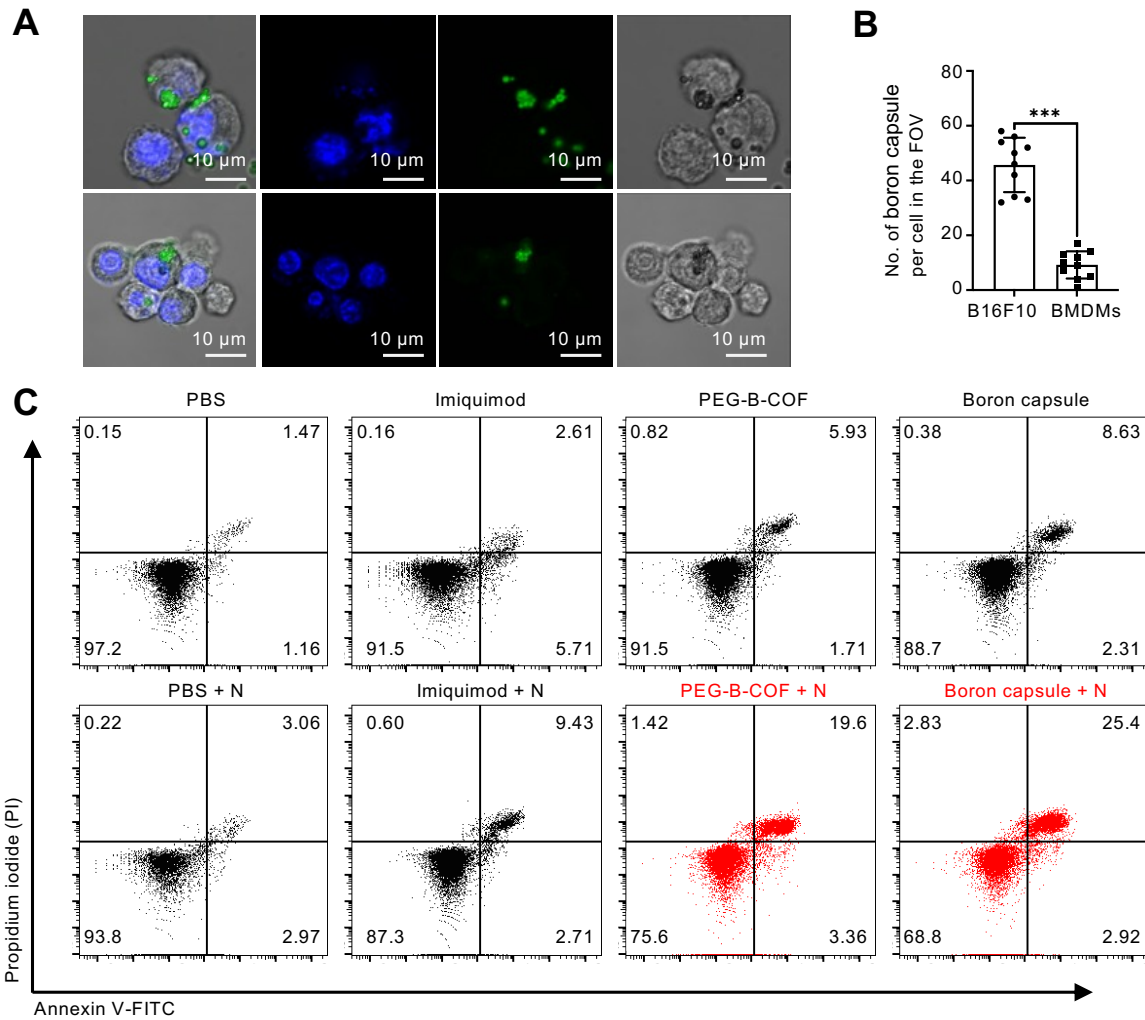

**Supplementary Figure 15. Primary mouse bone-marrow-derived macrophages (BMDMs) is not as sensitive as B16F10 in cellular uptake of boron capsule and related cell death.**

(A), Representative confocal images of BMDMs cells are shown after being treated by FITC fluorophore-conjugated boron capsule (1 mg/mL) for 2 hours ( $n = 3$  samples). (B), Number of boron capsule per cell in the giving field of view (FOV) by confocal microscopy. Data are shown as mean  $\pm$  s.d. ( $n = 10$  fields of view). (C), The cell death rate was calculated as Annexin V-FITC+/PI+ cells and Annexin V-FITC+/PI- cells ( $n = 3$  samples).

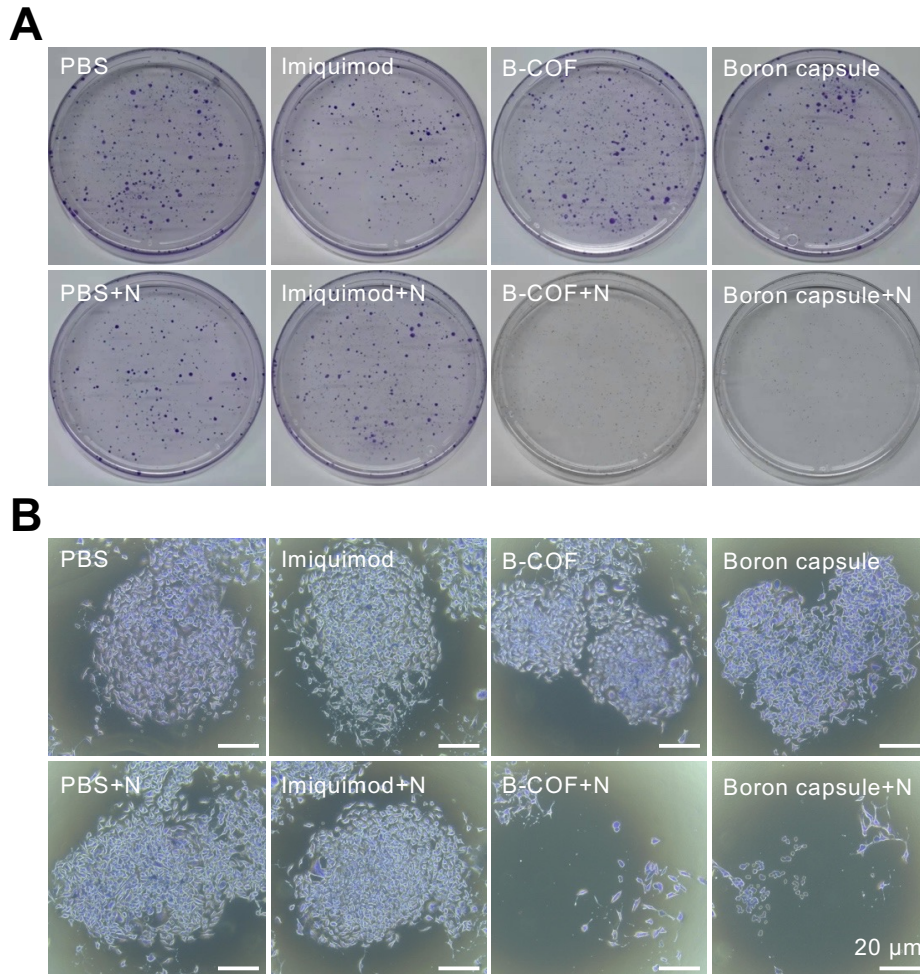

**Supplementary Figure 16. Boron neutron capture reaction remarkably inhibits the growth of cancer cells.**

Representative images of total colonies in a 10 cm Petri dish (**A**) and a representative cell colony (**B**) of B16F10 cells with indicated treatments ( $n = 4$ ). Scale bars, 20  $\mu\text{m}$ .

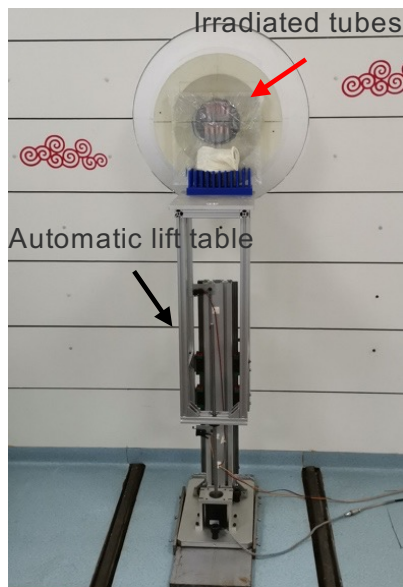

Tube experiment

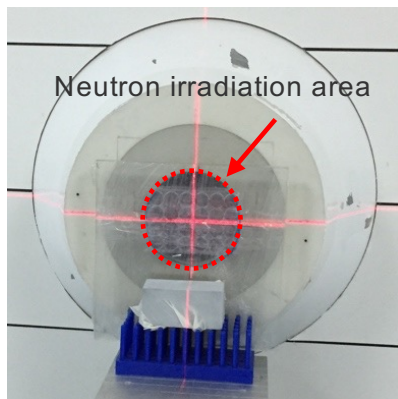

Cell experiment

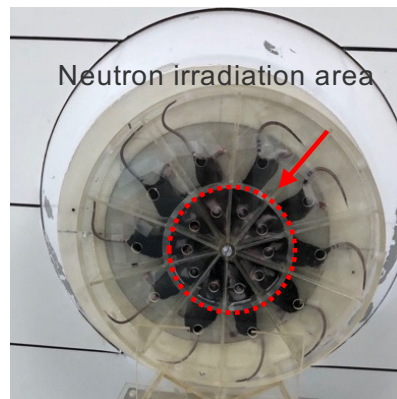

Mice experiment

**Supplementary Figure 17. The photos of the thermal neutron beam facility for neutron-irradiation experiments of tubes, cells and mice.**

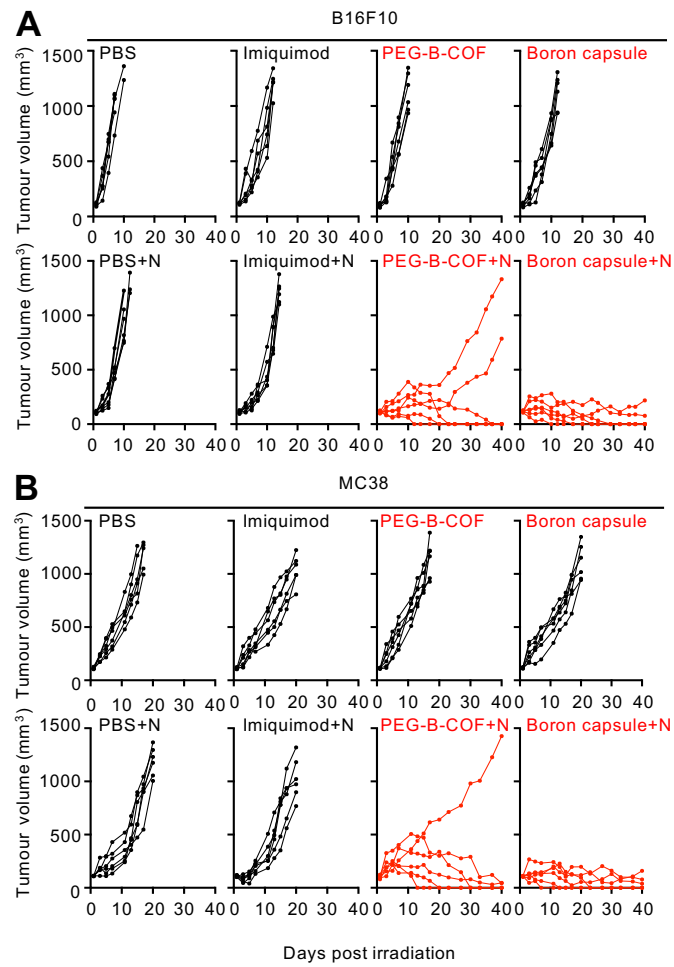

**Supplementary Figure 18. B16F10 (A) and MC38 (B) Tumour volume of the individual mouse at indicated time points after implantation.**

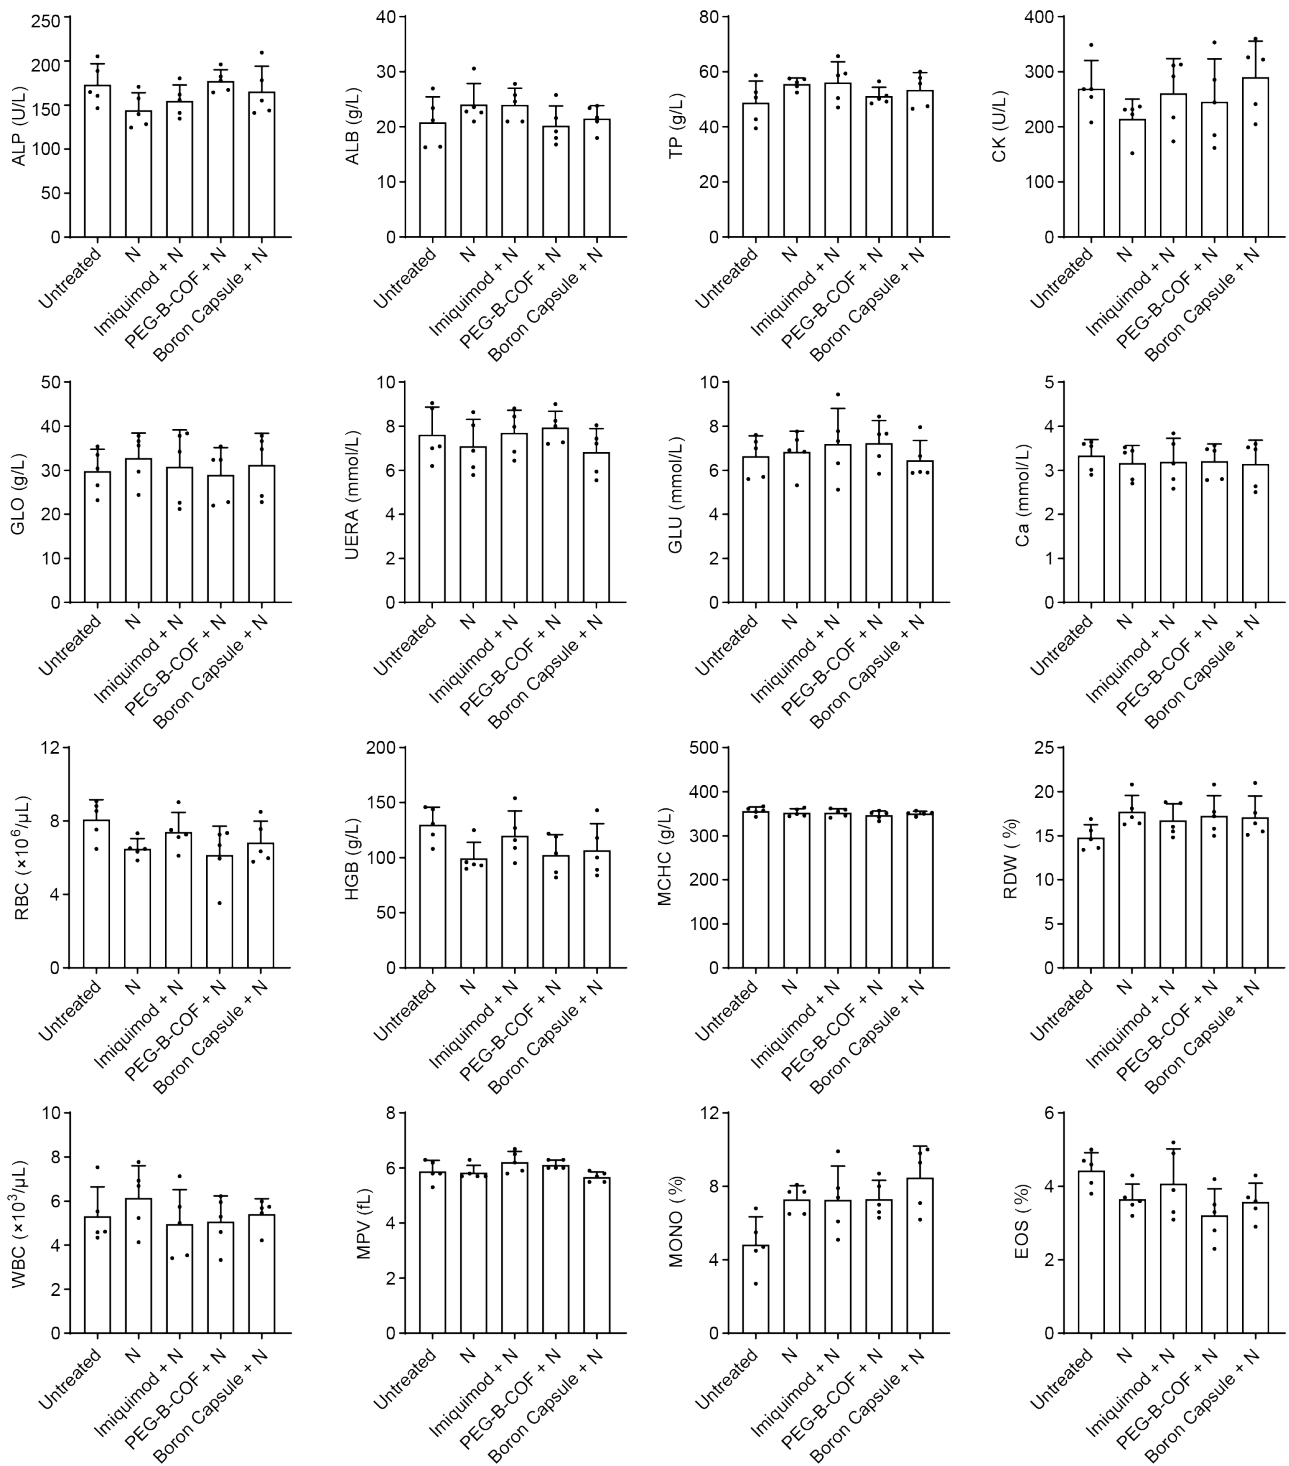

**Supplementary Figure 19.** The blood routine and biochemical test of B16F10 tumour-bearing mice treated with Neurtron (N) alone, Imiquimod, PEG-B-COF + N and Boron Capsule + N at day 14 ( $n = 4$  mice). Data are means  $\pm$  SD..



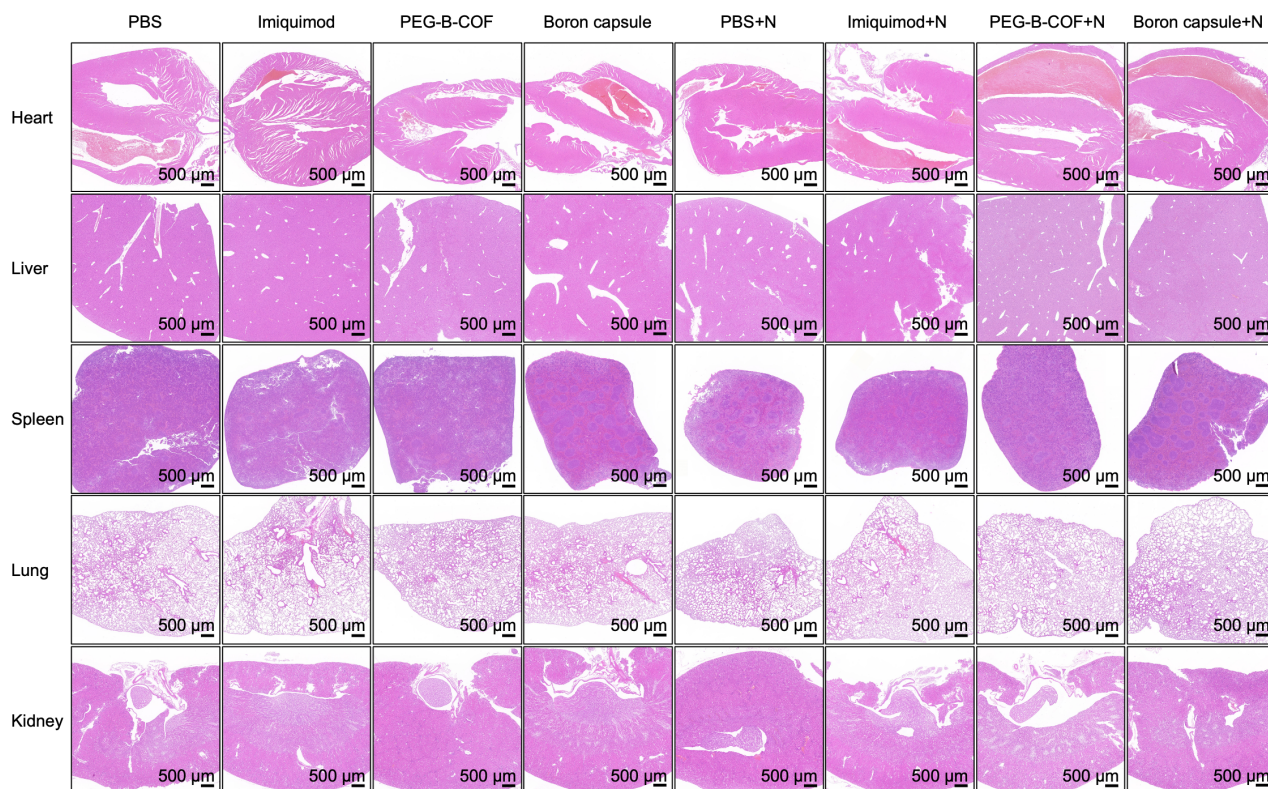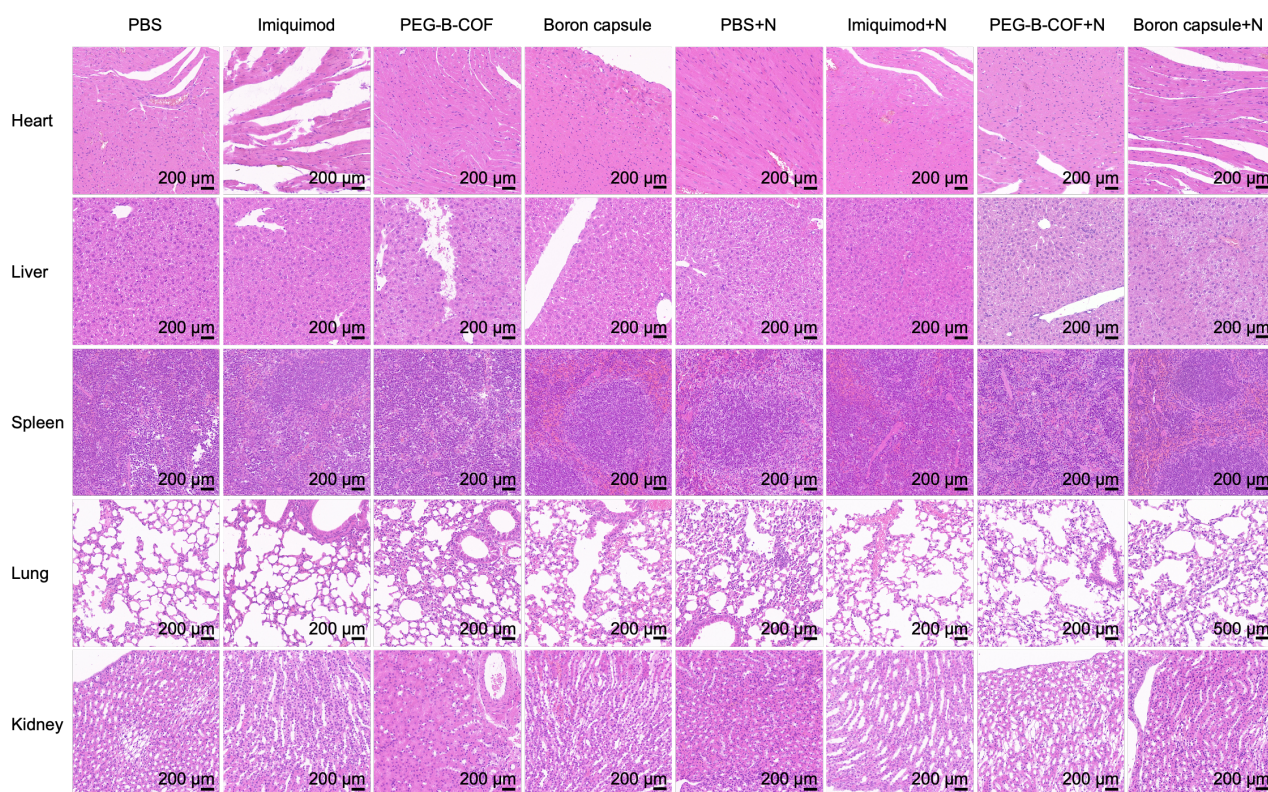

**Supplementary Figure 20. Representative H&E staining of major organs with different treatments ( $n = 3$  samples).**

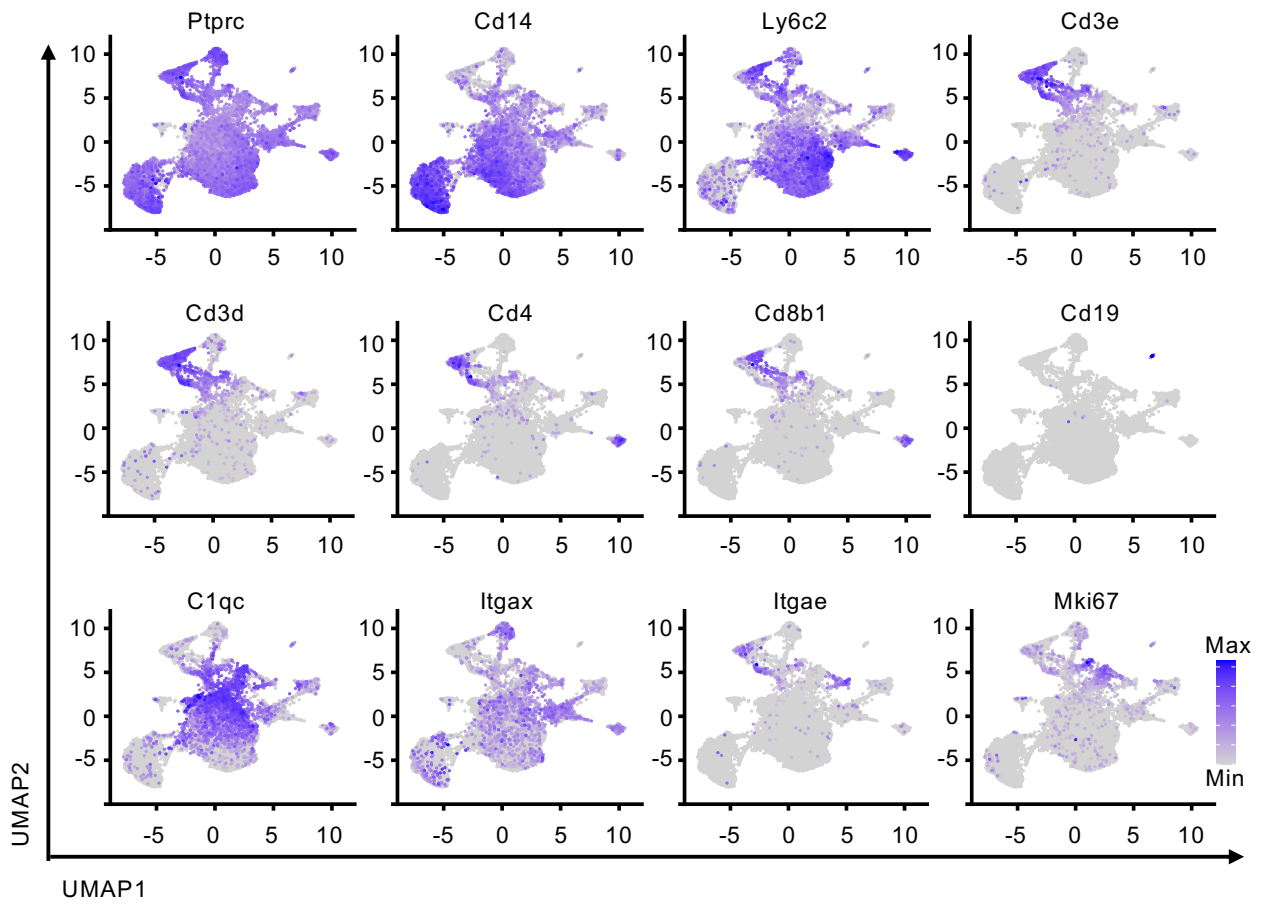

**Supplementary Figure 21. Signature gene-expression patterns for the corresponding cell clusters on the UMAP plot.**

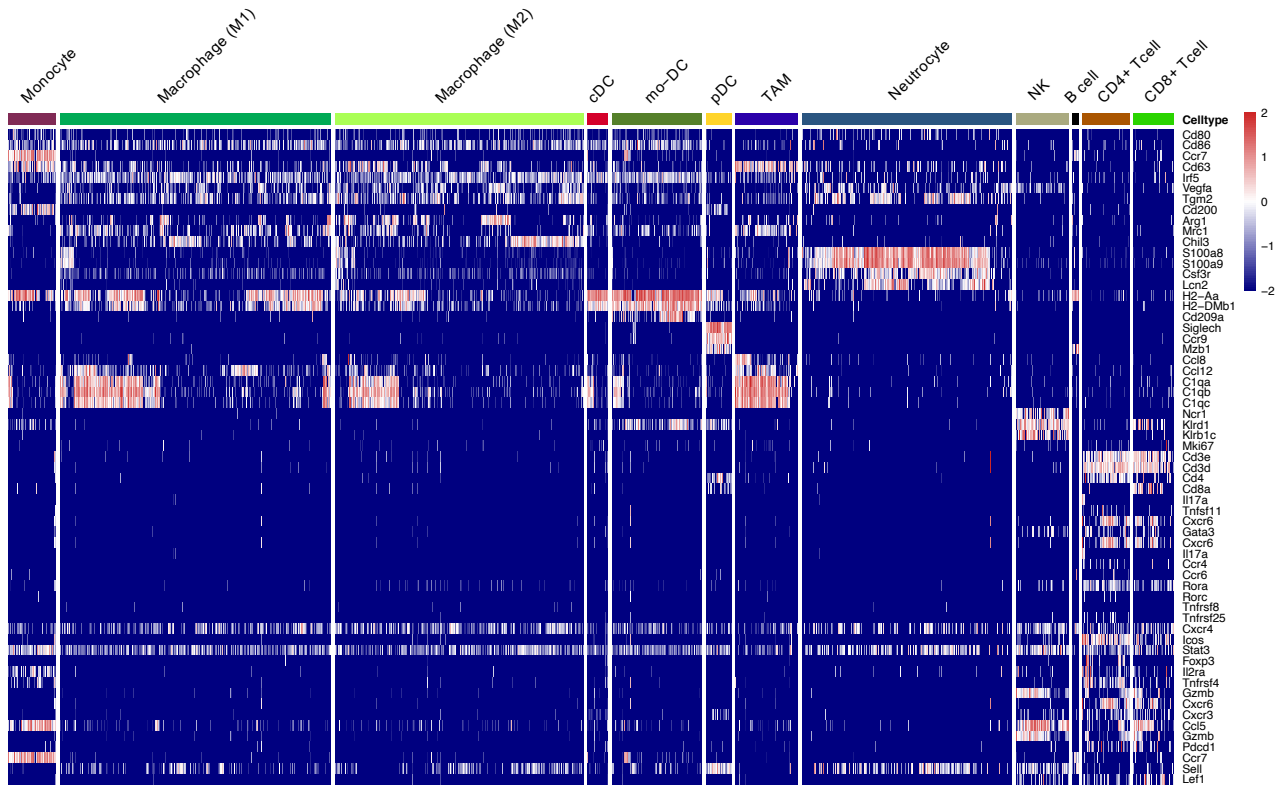

**Supplementary Figure 22. Heat map of immune-cell clusters with unique signature genes.**

Colors on top of the map indicate the immune-cell clusters. Conventional dendritic cell (cDC); monocyte-derived dendritic cell (mo-DC); Plasmacytoid dendritic cell (pDC); tumour-associated macrophage (TAM); natural killer cell (NK).



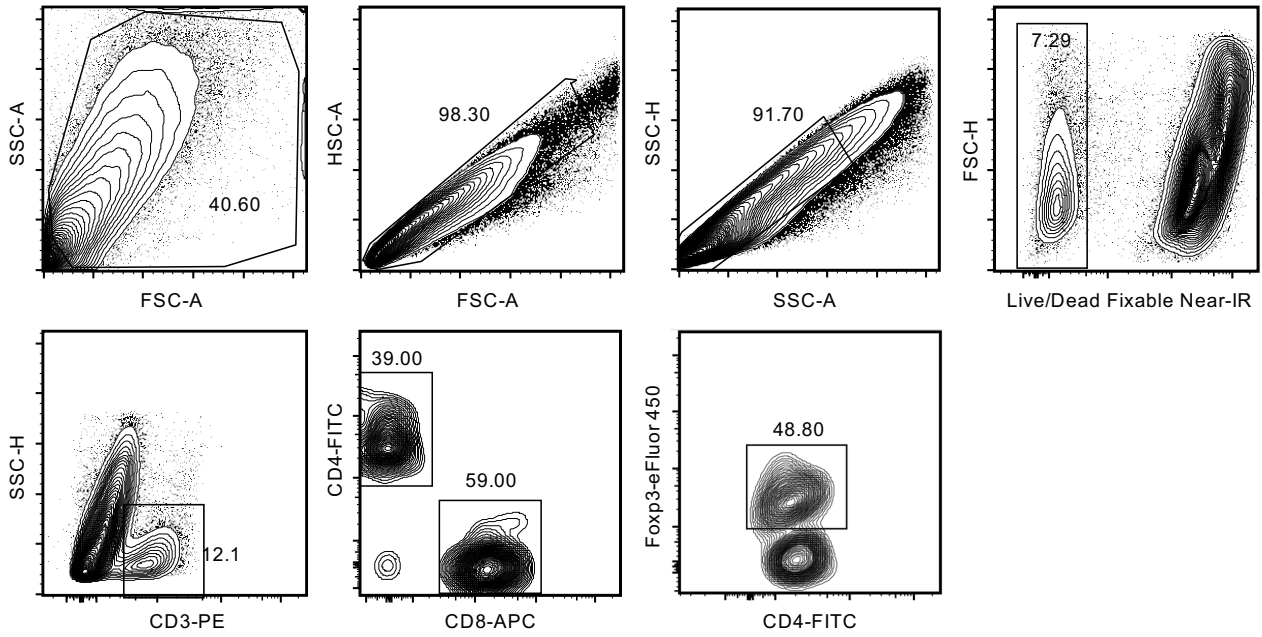

**Supplementary Figure 23. Representative gating strategies for CD3+ cells, CD4+ T cells, CD8+ T cells and Foxp3+ T cells.**

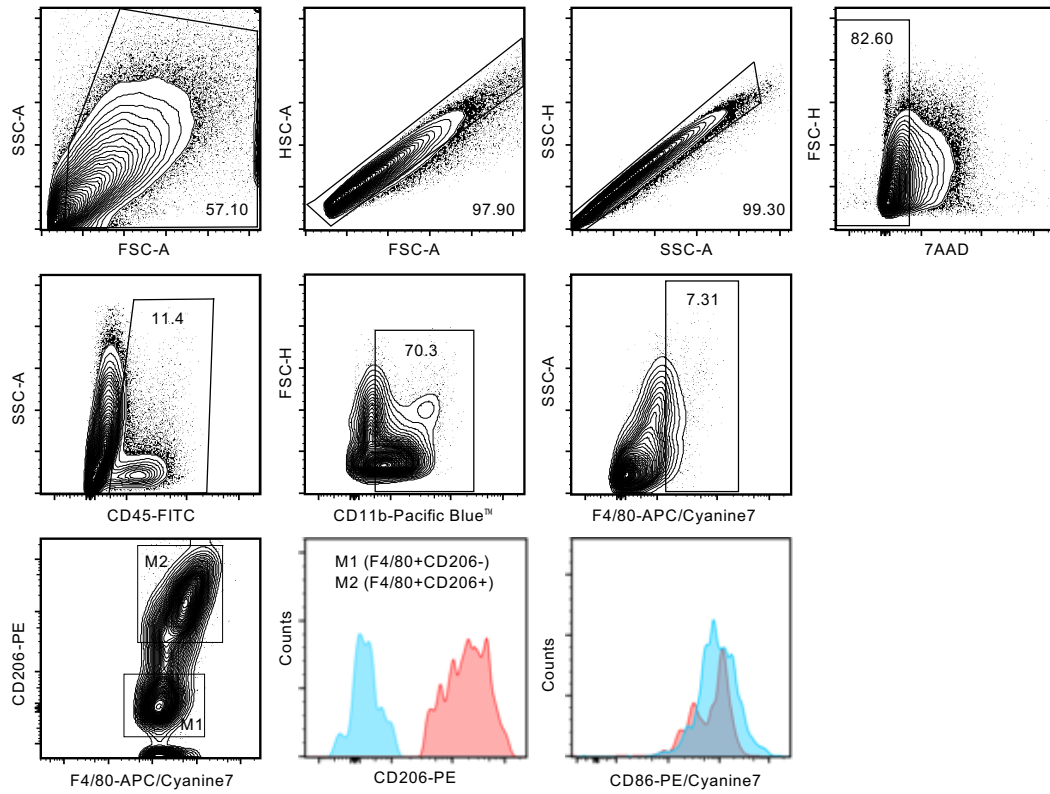

**Supplementary Figure 24. Representative gating strategies for macrophages.**

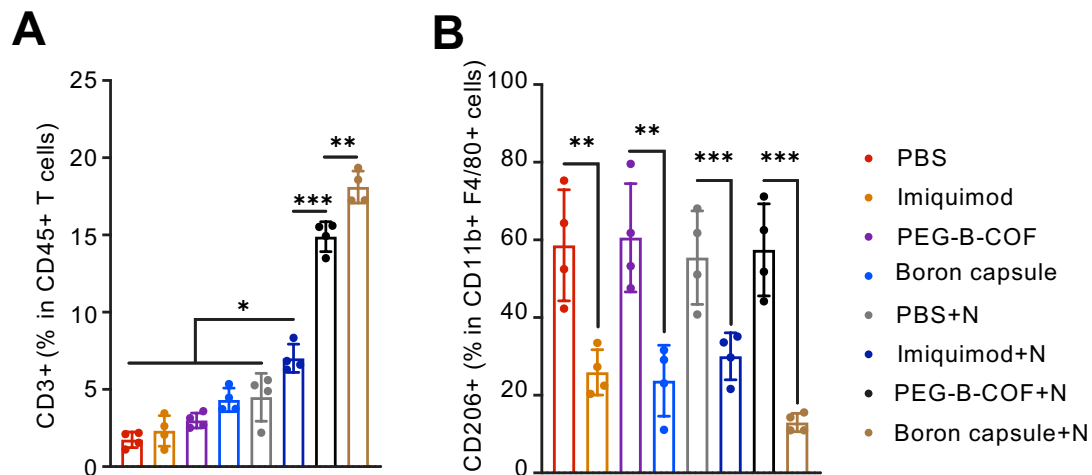

**Supplementary Figure 25. BNCT with boron capsule exhibits robust immune responses *in vivo*.**

(A, B), Percentages of CD3+ (A) and M2 (B) macrophages in B16F10 tumours. Data shown as mean  $\pm$  s.d. ( $n = 4$  independent experiments). One-way analysis of variance (ANOVA) followed by Tukey's HSD post hoc test. \* $P < 0.05$ , \*\* $P < 0.01$ , \*\*\* $P < 0.001$ .

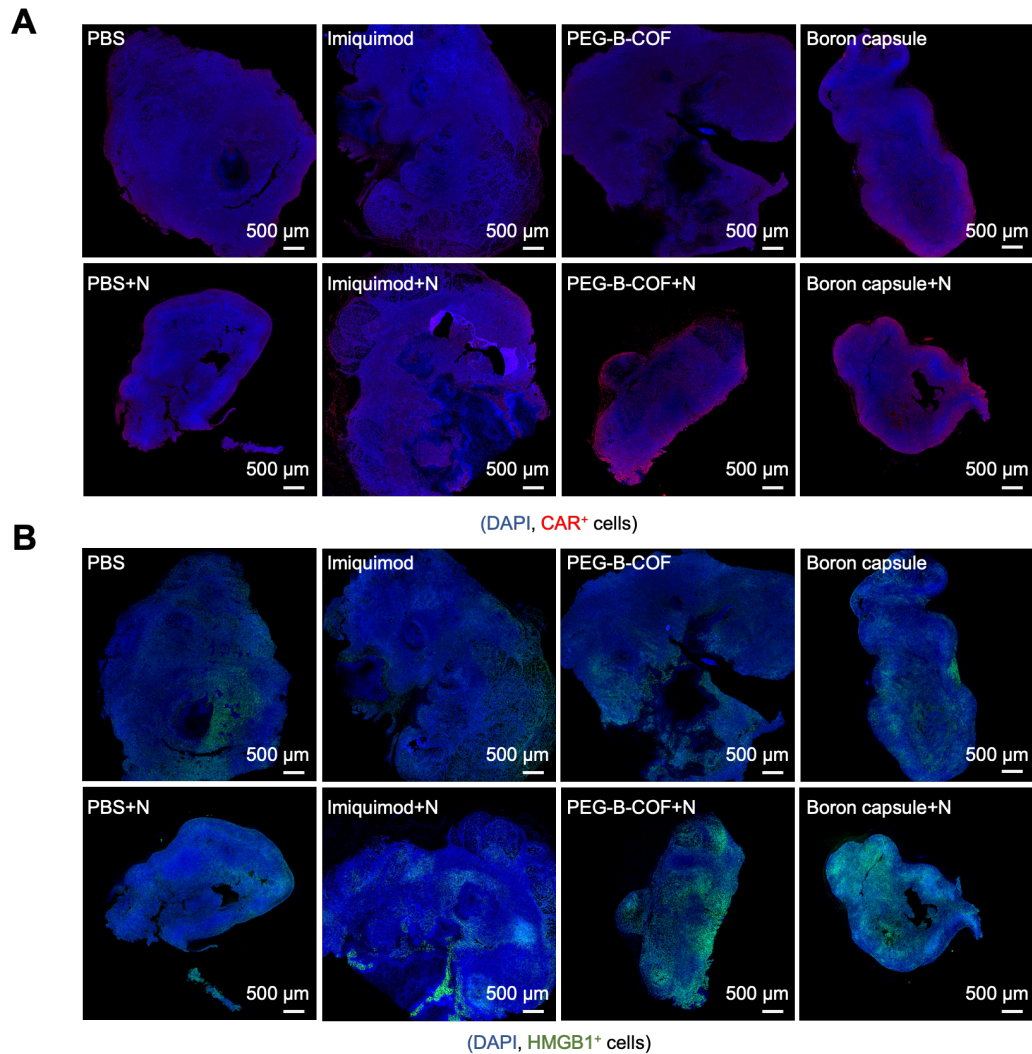

**Supplementary Figure 26. BNCT with boron capsule induces the immunogenic cell death in tumour.**

Representative immunofluorescence staining of calreticulin (CRT) exposure (**A**) and high-mobility group box 1 protein (HMGB1) release (**B**) are shown. Tumour were harvested 7 days after the indicated treatment.

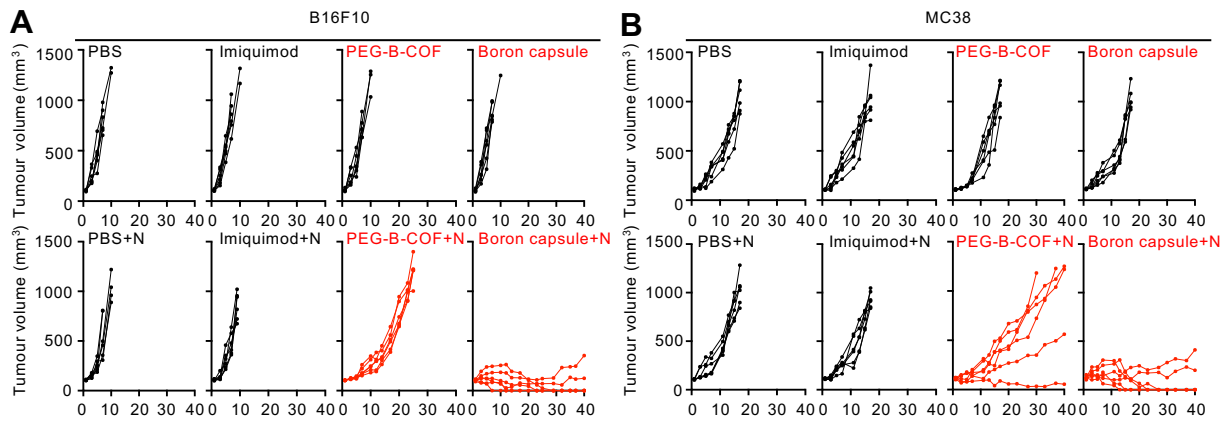

**Supplementary Figure 27. The distant tumour volume of the individual mouse at indicated time points after implantation.**



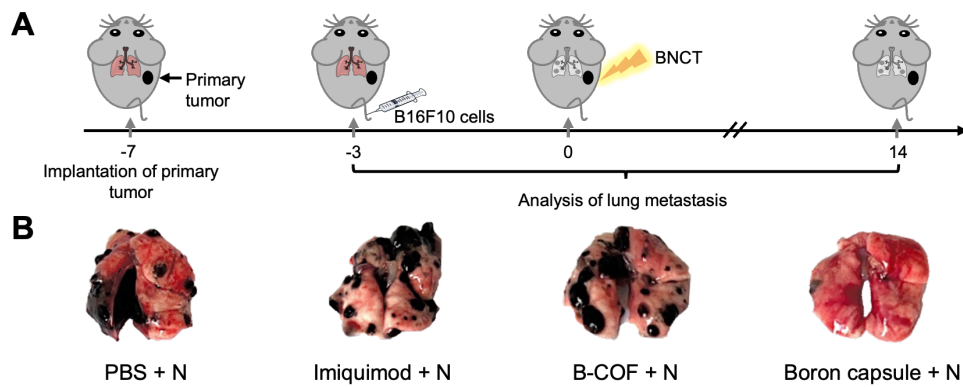

**Supplementary Figure 28. Metastasis inhibition in lung metastatic B16F10 and subcutaneous B16F10 tumour models by BNCT with immunological adjuvant-loaded boron capsule.**

(A), Treatment scheme. (B), Representative lung photographs for each treatment group ( $n = 6$  mice).

**Supplementary Table 1. Reaction conditions screening for B-COF synthesis.**

| Entry | TPB (mmol) | Solvents                  | Volume (mL) | Catalyst | Temp.       | Time | Adding            | Remarks   |
|-------|------------|---------------------------|-------------|----------|-------------|------|-------------------|-----------|
| 1     | 0.02       | methanol                  | 2.5         | 12M HAc  | 150 $\mu$ L | R.T  | 8 h               | poor      |
| 2     | 0.02       | ethanol                   | 2.5         | 12M HAc  | 150 $\mu$ L | R.T  | 8 h               | poor      |
| 3     | 0.02       | <i>n</i> -butanol         | 2.5         | 12M HAc  | 150 $\mu$ L | R.T  | 8 h               | poor      |
| 4     | 0.02       | acetone                   | 2.5         | 12M HAc  | 150 $\mu$ L | R.T  | 8 h               | poor      |
| 5     | 0.02       | mesitylene                | 2.5         | 12M HAc  | 150 $\mu$ L | R.T  | 8 h               | poor      |
| 6     | 0.02       | <i>o</i> -dichlorobenzene | 2.5         | 12M HAc  | 150 $\mu$ L | R.T  | 8 h               | poor      |
| 7     | 0.02       | <i>o</i> -dichlorobenzene | 2.5         | 12M HAc  | 150 $\mu$ L | 37°C | 8 h               | excellent |
| 8     | 0.02       | <i>o</i> -dichlorobenzene | 2.5         | 12M HAc  | 150 $\mu$ L | 50°C | 8 h               | excellent |
| 9     | 0.02       | <i>o</i> -dichlorobenzene | 2.5         | 12M HAc  | 150 $\mu$ L | R.T  | 8 h PS 50 $\mu$ L | excellent |

**Supplementary Table 2. Atomistic coordinates for the AA-stacking mode of B-COF optimized by using the Materials Studio Forcite molecular dynamics module (Universal force fields).**

| B-COF: Space group symmetry $P3$                                                                     |         |         |         |     |         |         |         |
|------------------------------------------------------------------------------------------------------|---------|---------|---------|-----|---------|---------|---------|
| $a = b = 51.2534 \text{ \AA}, c = 5.3349 \text{ \AA}, \alpha = \beta = 90^\circ, \gamma = 120^\circ$ |         |         |         |     |         |         |         |
|                                                                                                      | X       | Y       | Z       |     | X       | Y       | Z       |
| N1                                                                                                   | 0.82587 | 0.41860 | 2.30183 | H37 | 0.49729 | 0.52514 | 3.81591 |
| C2                                                                                                   | 0.65031 | 0.34863 | 2.16461 | C38 | 0.55681 | 0.40088 | 3.18428 |
| C3                                                                                                   | 0.68189 | 0.36483 | 2.16323 | C39 | 0.41129 | 0.57868 | 3.75914 |
| C4                                                                                                   | 0.63312 | 0.36455 | 2.18879 | C40 | 0.49217 | 0.46542 | 3.38653 |
| C5                                                                                                   | 0.74567 | 0.35920 | 2.37586 | C41 | 0.50851 | 0.44765 | 3.33866 |
| C6                                                                                                   | 0.77678 | 0.37634 | 2.40912 | C42 | 0.53511 | 0.45472 | 3.47132 |
| C7                                                                                                   | 0.79414 | 0.40133 | 2.25648 | H43 | 0.54401 | 0.47197 | 3.61417 |
| C8                                                                                                   | 0.78001 | 0.40886 | 2.06626 | C44 | 0.55078 | 0.43953 | 3.42350 |
| C9                                                                                                   | 0.74883 | 0.39177 | 2.03353 | C45 | 0.54033 | 0.41674 | 3.24197 |
| N10                                                                                                  | 0.42620 | 0.82084 | 0.95589 | C46 | 0.51360 | 0.40881 | 3.11425 |
| C11                                                                                                  | 0.35053 | 0.69830 | 1.25192 | C47 | 0.49763 | 0.42372 | 3.16404 |
| C12                                                                                                  | 0.36479 | 0.68104 | 1.25571 | H48 | 0.47686 | 0.41626 | 3.06333 |
| C13                                                                                                  | 0.36011 | 0.74238 | 0.99020 | B49 | 0.49817 | 0.49343 | 3.21288 |
| C14                                                                                                  | 0.40584 | 0.79075 | 1.03898 | H50 | 0.51774 | 0.50227 | 3.06212 |
| C15                                                                                                  | 0.41365 | 0.77950 | 1.24758 | B51 | 0.51101 | 0.49975 | 3.49371 |
| C16                                                                                                  | 0.39517 | 0.74965 | 1.32432 | H52 | 0.53736 | 0.51217 | 3.53405 |
| C17                                                                                                  | 0.36242 | 0.63162 | 1.19454 | B53 | 0.48651 | 0.47174 | 3.66434 |
| C18                                                                                                  | 0.39342 | 0.62137 | 0.91282 | H54 | 0.49571 | 0.46157 | 3.81501 |
| C19                                                                                                  | 0.45997 | 0.50145 | 3.49157 | B55 | 0.45791 | 0.44837 | 3.49316 |
| C20                                                                                                  | 0.44430 | 0.51978 | 3.54300 | H56 | 0.44477 | 0.42200 | 3.53418 |
| C21                                                                                                  | 0.42111 | 0.51050 | 3.72315 | B57 | 0.46464 | 0.46138 | 3.21317 |

|     |         |         |         |     |         |         |          |
|-----|---------|---------|---------|-----|---------|---------|----------|
| H22 | 0.41172 | 0.48904 | 3.81652 | H58 | 0.45391 | 0.44209 | 3.06163  |
| C23 | 0.41005 | 0.52936 | 3.79353 | H59 | 0.44992 | 0.58717 | 0.38848  |
| C24 | 0.42093 | 0.55746 | 3.67824 | H60 | 0.39321 | 0.52206 | 0.94009  |
| C25 | 0.44188 | 0.56584 | 3.48405 | H61 | 0.57117 | 0.44577 | 0.52833  |
| C26 | 0.45347 | 0.54730 | 3.41702 | H62 | 0.50500 | 0.39096 | -0.02429 |
| H27 | 0.47003 | 0.55496 | 3.26863 | H63 | 0.62958 | 0.41697 | 0.55671  |
| B28 | 0.45404 | 0.47323 | 3.66479 | H64 | 0.60206 | 0.34033 | -0.11282 |
| H29 | 0.43474 | 0.46350 | 3.81656 | H65 | 0.57205 | 0.36501 | -0.05568 |
| B30 | 0.44103 | 0.46726 | 3.38477 | H66 | 0.65962 | 0.39224 | 0.50035  |
| H31 | 0.41472 | 0.45564 | 3.34381 | H67 | 0.69368 | 0.38924 | 0.16972  |
| B32 | 0.46563 | 0.49514 | 3.21372 | H68 | 0.38912 | 0.69212 | 1.24077  |
| H33 | 0.45663 | 0.50551 | 3.06349 | H69 | 0.33917 | 0.59804 | 1.48219  |
| B34 | 0.49435 | 0.51839 | 3.38436 | H70 | 0.35928 | 0.56556 | 1.34731  |
| H35 | 0.50823 | 0.54474 | 3.34397 | H71 | 0.38818 | 0.66009 | 0.88352  |
| B36 | 0.48732 | 0.50555 | 3.66513 | H72 | 0.40809 | 0.62803 | 0.75088  |

**Supplementary Table 3. Atomistic coordinates for the AB-stacking mode of B-COF optimized by using the Materials Studio Forcite molecular dynamics module (Universal force fields).**

| B-COF: Space group symmetry $P3$                                                                      |         |         |          |     |         |         |         |
|-------------------------------------------------------------------------------------------------------|---------|---------|----------|-----|---------|---------|---------|
| $a = b = 51.2534 \text{ \AA}, c = 10.6697 \text{ \AA}, \alpha = \beta = 90^\circ, \gamma = 120^\circ$ |         |         |          |     |         |         |         |
|                                                                                                       | X       | Y       | Z        |     | X       | Y       | Z       |
| N1                                                                                                    | 0.81966 | 0.45204 | -0.01863 | N73 | 1.15745 | 0.10907 | 1.14736 |
| C2                                                                                                    | 0.64305 | 0.33998 | -0.07206 | C74 | 0.97830 | 0.00931 | 1.12976 |
| C3                                                                                                    | 0.67326 | 0.36331 | -0.07314 | C75 | 1.00923 | 0.03072 | 1.12950 |
| C4                                                                                                    | 0.61823 | 0.34697 | -0.06161 | C76 | 0.95546 | 0.01912 | 1.13307 |
| C5                                                                                                    | 0.74882 | 0.37873 | 0.01863  | C77 | 1.08334 | 0.04049 | 1.21183 |
| C6                                                                                                    | 0.77839 | 0.40222 | 0.03282  | C78 | 1.11401 | 0.06198 | 1.21573 |
| C7                                                                                                    | 0.78873 | 0.42915 | -0.03335 | C79 | 1.12572 | 0.08786 | 1.14105 |
| C8                                                                                                    | 0.76887 | 0.43247 | -0.11413 | C80 | 1.10614 | 0.09209 | 1.06206 |
| C9                                                                                                    | 0.73909 | 0.40896 | -0.12777 | C81 | 1.07539 | 0.07064 | 1.05842 |
| N10                                                                                                   | 0.45419 | 0.81953 | -0.02450 | N82 | 0.79242 | 0.48274 | 1.22886 |
| C11                                                                                                   | 0.35720 | 0.69677 | -0.02205 | C83 | 0.69127 | 0.36308 | 1.28310 |
| C12                                                                                                   | 0.36321 | 0.67287 | -0.02190 | C84 | 0.69614 | 0.33844 | 1.28404 |
| C13                                                                                                   | 0.38163 | 0.74938 | -0.10708 | C85 | 0.71566 | 0.41478 | 1.18911 |
| C14                                                                                                   | 0.42994 | 0.78882 | -0.02743 | C86 | 0.76705 | 0.45285 | 1.24111 |
| C15                                                                                                   | 0.43053 | 0.76799 | 0.05575  | C87 | 0.76838 | 0.43279 | 1.32649 |
| C16                                                                                                   | 0.40706 | 0.73801 | 0.05697  | C88 | 0.74378 | 0.40364 | 1.34112 |
| C17                                                                                                   | 0.34616 | 0.61770 | -0.02402 | C89 | 0.67718 | 0.28287 | 1.27232 |
| C18                                                                                                   | 0.37398 | 0.59475 | -0.10933 | C90 | 0.70324 | 0.25964 | 1.17278 |
| C19                                                                                                   | 0.42133 | 0.45373 | -0.07900 | C91 | 0.75065 | 0.12200 | 1.10603 |
| C20                                                                                                   | 0.40821 | 0.47484 | -0.08931 | C92 | 0.73337 | 0.13935 | 1.10821 |
| C21                                                                                                   | 0.39095 | 0.47746 | 0.00805  | C93 | 0.71942 | 0.14167 | 1.21868 |

|     |         |         |          |      |         |         |         |
|-----|---------|---------|----------|------|---------|---------|---------|
| H22 | 0.38518 | 0.46368 | 0.09111  | H94  | 0.71849 | 0.12950 | 1.30260 |
| C23 | 0.38149 | 0.49877 | 0.00170  | C95  | 0.70797 | 0.16135 | 1.22547 |
| C24 | 0.38916 | 0.51812 | -0.10180 | C96  | 0.71032 | 0.17934 | 1.12235 |
| C25 | 0.40556 | 0.51529 | -0.20008 | C97  | 0.72253 | 0.17608 | 1.01042 |
| C26 | 0.41487 | 0.49396 | -0.19442 | C98  | 0.73382 | 0.15635 | 1.00305 |
| H27 | 0.42811 | 0.49316 | -0.27166 | H99  | 0.74437 | 0.15577 | 0.91621 |
| B28 | 0.41346 | 0.43063 | 0.03902  | B100 | 0.74780 | 0.09951 | 1.22026 |
| H29 | 0.39685 | 0.42808 | 0.12183  | H101 | 0.73166 | 0.09430 | 1.30806 |
| B30 | 0.40081 | 0.41765 | -0.10291 | B102 | 0.73405 | 0.08594 | 1.08016 |
| H31 | 0.37471 | 0.40631 | -0.12750 | H103 | 0.70760 | 0.07147 | 1.06257 |
| B32 | 0.42694 | 0.43939 | -0.20527 | B104 | 0.75687 | 0.11008 | 0.97402 |
| H33 | 0.42018 | 0.44380 | -0.30654 | H105 | 0.74734 | 0.11302 | 0.87658 |
| B34 | 0.45572 | 0.46612 | -0.12642 | B106 | 0.78461 | 0.13890 | 1.04874 |
| H35 | 0.47066 | 0.49082 | -0.16815 | H107 | 0.79583 | 0.16383 | 1.00793 |
| B36 | 0.44727 | 0.46082 | 0.02447  | B108 | 0.77891 | 0.13243 | 1.20095 |
| H37 | 0.45571 | 0.48154 | 0.09475  | H109 | 0.78580 | 0.15251 | 1.27341 |
| C38 | 0.52250 | 0.35541 | -0.07816 | C110 | 0.86665 | 0.03792 | 1.08013 |
| C39 | 0.38169 | 0.54237 | -0.10834 | C111 | 0.70326 | 0.20380 | 1.13166 |
| C40 | 0.44990 | 0.41341 | -0.06154 | C112 | 0.78784 | 0.08990 | 1.10151 |
| C41 | 0.46539 | 0.39440 | -0.05273 | C113 | 0.80731 | 0.07482 | 1.10057 |
| C42 | 0.48866 | 0.40185 | 0.03541  | C114 | 0.83193 | 0.08458 | 1.18379 |
| H43 | 0.49424 | 0.41928 | 0.10458  | H115 | 0.83692 | 0.10204 | 1.25214 |
| C44 | 0.50641 | 0.38829 | 0.03135  | C116 | 0.85105 | 0.07251 | 1.17879 |
| C45 | 0.50125 | 0.36655 | -0.05992 | C117 | 0.84610 | 0.05016 | 1.09091 |
| C46 | 0.47678 | 0.35714 | -0.14138 | C118 | 0.82141 | 0.03970 | 1.00991 |
| C47 | 0.45909 | 0.37091 | -0.13832 | C119 | 0.80228 | 0.05185 | 1.01426 |

|     |         |         |          |      |         |          |         |
|-----|---------|---------|----------|------|---------|----------|---------|
| H48 | 0.44132 | 0.36372 | -0.20668 | H120 | 0.78392 | 0.04332  | 0.94822 |
| B49 | 0.45763 | 0.43617 | -0.17935 | B121 | 0.79058 | 0.11204  | 0.98720 |
| H50 | 0.47435 | 0.43776 | -0.26035 | H122 | 0.80686 | 0.11631  | 0.90048 |
| B51 | 0.47020 | 0.44954 | -0.03750 | B123 | 0.80417 | 0.12598  | 1.12734 |
| H52 | 0.49635 | 0.46136 | -0.01349 | H124 | 0.83060 | 0.14086  | 1.14447 |
| B53 | 0.44412 | 0.42756 | 0.06481  | B125 | 0.78143 | 0.10160  | 1.23341 |
| H54 | 0.45057 | 0.42278 | 0.16607  | H126 | 0.79068 | 0.09811  | 1.33061 |
| B55 | 0.41549 | 0.40074 | -0.01419 | B127 | 0.75384 | 0.07276  | 1.15839 |
| H56 | 0.40091 | 0.37600 | 0.02767  | H128 | 0.74285 | 0.04783  | 1.19907 |
| B57 | 0.42365 | 0.40623 | -0.16500 | B129 | 0.75927 | 0.07933  | 1.00650 |
| H58 | 0.41436 | 0.38584 | -0.23701 | H130 | 0.75142 | 0.05942  | 0.93276 |
| H59 | 0.41170 | 0.53005 | -0.28078 | H131 | 0.72448 | 0.18979  | 0.92974 |
| H60 | 0.36882 | 0.50057 | 0.07914  | H132 | 0.69862 | 0.16352  | 1.31328 |
| H61 | 0.52489 | 0.39566 | 0.09703  | H133 | 0.86990 | 0.08095  | 1.24307 |
| H62 | 0.47221 | 0.34008 | -0.21150 | H134 | 0.81717 | 0.02238  | 0.94156 |
| H63 | 0.60058 | 0.39399 | 0.09562  | H135 | 0.94156 | 0.07033  | 1.27722 |
| H64 | 0.58806 | 0.31231 | -0.19095 | H136 | 0.92575 | -0.01341 | 0.99597 |
| H65 | 0.54693 | 0.32326 | -0.16666 | H137 | 0.88814 | 0.00269  | 1.00309 |
| H66 | 0.64161 | 0.38314 | 0.07259  | H138 | 0.97913 | 0.05408  | 1.27178 |
| H67 | 0.67835 | 0.38651 | -0.07192 | H139 | 1.01638 | 0.05450  | 1.13022 |
| H68 | 0.38634 | 0.67768 | -0.02235 | H140 | 0.71896 | 0.34238  | 1.28237 |
| H69 | 0.31438 | 0.59199 | 0.12263  | H141 | 0.64299 | 0.25451  | 1.40691 |
| H70 | 0.32576 | 0.55074 | 0.11982  | H142 | 0.65104 | 0.21136  | 1.38082 |
| H71 | 0.37960 | 0.63705 | -0.17125 | H143 | 0.71270 | 0.30440  | 1.13431 |
| H72 | 0.39079 | 0.59597 | -0.17424 | H144 | 0.72023 | 0.26151  | 1.10730 |

**Supplementary Table 4. Atomistic coordinates for the ABC-stacking mode of B-COF optimized by using the Materials Studio Forcite molecular dynamics module (Universal force fields).**

| B-COF: Space group symmetry $P1$                                                                      |         |         |         |      |         |         |         |
|-------------------------------------------------------------------------------------------------------|---------|---------|---------|------|---------|---------|---------|
| $a = b = 51.2534 \text{ \AA}, c = 16.0047 \text{ \AA}, \alpha = \beta = 90^\circ, \gamma = 120^\circ$ |         |         |         |      |         |         |         |
|                                                                                                       | X       | Y       | Z       |      | X       | Y       | Z       |
| N1                                                                                                    | 0.49438 | 0.07737 | 0.20775 | H325 | 0.79011 | 0.30731 | 1.05777 |
| C2                                                                                                    | 0.31920 | 0.01974 | 0.17132 | C326 | 0.92595 | 0.48826 | 0.85413 |
| C3                                                                                                    | 0.35075 | 0.03421 | 0.17252 | C327 | 0.73603 | 0.16412 | 1.03533 |
| C4                                                                                                    | 0.30332 | 0.03724 | 0.17737 | C328 | 0.85190 | 0.35873 | 0.91242 |
| C5                                                                                                    | 0.41281 | 0.02105 | 0.23145 | C329 | 0.87123 | 0.39269 | 0.89598 |
| C6                                                                                                    | 0.44414 | 0.03579 | 0.23944 | C330 | 0.86379 | 0.41313 | 0.93313 |
| C7                                                                                                    | 0.46235 | 0.06267 | 0.19640 | H331 | 0.84456 | 0.40546 | 0.97408 |
| C8                                                                                                    | 0.44873 | 0.07462 | 0.14442 | C332 | 0.88131 | 0.44407 | 0.91942 |
| C9                                                                                                    | 0.41738 | 0.05990 | 0.13642 | C333 | 0.90707 | 0.45566 | 0.86890 |
| N10                                                                                                   | 0.08291 | 0.48765 | 0.43532 | C334 | 0.91511 | 0.43582 | 0.83288 |
| C11                                                                                                   | 0.01185 | 0.36517 | 0.54264 | C335 | 0.89749 | 0.40475 | 0.84613 |
| C12                                                                                                   | 0.03273 | 0.35562 | 0.55431 | H336 | 0.90492 | 0.39046 | 0.81794 |
| C13                                                                                                   | 0.03112 | 0.40165 | 0.42461 | B337 | 0.82582 | 0.33676 | 0.84723 |
| C14                                                                                                   | 0.06467 | 0.45667 | 0.45937 | H338 | 0.82121 | 0.34631 | 0.78454 |
| C15                                                                                                   | 0.06509 | 0.44895 | 0.54298 | B339 | 0.81671 | 0.34439 | 0.93950 |
| C16                                                                                                   | 0.04531 | 0.42010 | 0.57284 | H340 | 0.80463 | 0.35901 | 0.94490 |
| C17                                                                                                   | 0.04557 | 0.31452 | 0.55426 | B341 | 0.84215 | 0.34716 | 1.00794 |
| C18                                                                                                   | 0.05762 | 0.28956 | 0.43545 | H342 | 0.84970 | 0.36441 | 1.06483 |
| C19                                                                                                   | 0.13232 | 0.17595 | 0.29464 | B343 | 0.86681 | 0.34099 | 0.95795 |
| C20                                                                                                   | 0.11637 | 0.19336 | 0.31930 | H344 | 0.89270 | 0.35370 | 0.97748 |
| C21                                                                                                   | 0.10965 | 0.19541 | 0.40389 | B345 | 0.85652 | 0.33424 | 0.85871 |



|     |         |         |         |      |         |         |         |
|-----|---------|---------|---------|------|---------|---------|---------|
| H22 | 0.11508 | 0.18437 | 0.45281 | H346 | 0.87430 | 0.34098 | 0.80361 |
| C23 | 0.09668 | 0.21262 | 0.42745 | H347 | 0.72562 | 0.19592 | 0.92068 |
| C24 | 0.09017 | 0.22839 | 0.36718 | H348 | 0.79318 | 0.20265 | 1.09324 |
| C25 | 0.09647 | 0.22644 | 0.28324 | H349 | 0.87477 | 0.45892 | 0.94909 |
| C26 | 0.10950 | 0.20928 | 0.25944 | H350 | 0.93524 | 0.44438 | 0.79501 |
| H27 | 0.11472 | 0.20929 | 0.19415 | H351 | 0.90775 | 0.54681 | 0.95549 |
| B28 | 0.12943 | 0.14871 | 0.35370 | H352 | 0.99732 | 0.59464 | 0.78278 |
| H29 | 0.11437 | 0.14072 | 0.41518 | H353 | 0.97011 | 0.54026 | 0.79369 |
| B30 | 0.11365 | 0.14155 | 0.26030 | H354 | 0.93524 | 0.60118 | 0.94738 |
| H31 | 0.08698 | 0.12886 | 0.25237 | H355 | 0.94915 | 0.64218 | 0.85791 |
| B32 | 0.13603 | 0.16929 | 0.19693 | H356 | 0.65826 | 0.02196 | 1.34117 |
| H33 | 0.12609 | 0.17649 | 0.14005 | H357 | 0.71937 | 0.07788 | 1.28530 |
| B34 | 0.16543 | 0.19397 | 0.25157 | H358 | 0.75193 | 0.12528 | 1.22179 |
| H35 | 0.17722 | 0.22025 | 0.23727 | H359 | 0.65223 | 0.06151 | 1.09745 |
| B36 | 0.16143 | 0.18130 | 0.34851 | H360 | 0.68822 | 0.10990 | 1.03105 |
| H37 | 0.17033 | 0.19817 | 0.40632 | N361 | 0.91916 | 0.50720 | 0.88718 |
| C38 | 0.23018 | 0.07782 | 0.17400 | C362 | 0.03706 | 0.68350 | 0.86090 |
| C39 | 0.07788 | 0.24790 | 0.39010 | C363 | 0.02011 | 0.65194 | 0.85883 |
| C40 | 0.16592 | 0.14230 | 0.24863 | C364 | 0.07053 | 0.69914 | 0.86591 |
| C41 | 0.18296 | 0.12561 | 0.22796 | C365 | 0.94289 | 0.58821 | 0.91228 |
| C42 | 0.21017 | 0.13308 | 0.26936 | C366 | 0.92666 | 0.55687 | 0.91882 |
| H43 | 0.21946 | 0.15050 | 0.31651 | C367 | 0.93624 | 0.53923 | 0.87676 |
| C44 | 0.22577 | 0.11790 | 0.25169 | C368 | 0.96230 | 0.55341 | 0.82688 |
| C45 | 0.21453 | 0.09462 | 0.19253 | C369 | 0.97854 | 0.58482 | 0.81996 |
| C46 | 0.18748 | 0.08671 | 0.15164 | N370 | 0.73633 | 0.91809 | 1.10955 |
| C47 | 0.17179 | 0.10187 | 0.16920 | C371 | 0.67942 | 0.98715 | 1.18890 |

|     |         |         |         |      |         |         |         |
|-----|---------|---------|---------|------|---------|---------|---------|
| H48 | 0.15079 | 0.09453 | 0.13690 | C372 | 0.65518 | 0.96874 | 1.24051 |
| B49 | 0.16879 | 0.16926 | 0.18908 | C373 | 0.68135 | 0.94890 | 1.09481 |
| H50 | 0.18376 | 0.17646 | 0.12738 | C374 | 0.72102 | 0.93455 | 1.12679 |
| B51 | 0.18442 | 0.17686 | 0.28271 | C375 | 0.72837 | 0.95160 | 1.20018 |
| H52 | 0.21108 | 0.19026 | 0.29044 | C376 | 0.71677 | 0.97050 | 1.21731 |
| B53 | 0.16216 | 0.14884 | 0.34587 | C377 | 0.60333 | 0.96238 | 1.23481 |
| H54 | 0.17216 | 0.14089 | 0.40106 | C378 | 0.57014 | 0.95862 | 1.11495 |
| B55 | 0.13270 | 0.12418 | 0.29106 | C379 | 0.38116 | 0.86839 | 0.96341 |
| H56 | 0.12090 | 0.09789 | 0.30517 | C380 | 0.41431 | 0.88700 | 0.98957 |
| B57 | 0.13666 | 0.13693 | 0.19443 | C381 | 0.42234 | 0.89121 | 1.07499 |
| H58 | 0.12713 | 0.12057 | 0.13584 | H382 | 0.40537 | 0.88225 | 1.12343 |
| H59 | 0.09175 | 0.23865 | 0.23598 | C383 | 0.45247 | 0.90685 | 1.09973 |
| H60 | 0.09227 | 0.21400 | 0.49301 | C384 | 0.47552 | 0.91897 | 1.03986 |
| H61 | 0.24650 | 0.12427 | 0.28496 | C385 | 0.46794 | 0.91597 | 0.95509 |
| H62 | 0.17832 | 0.06857 | 0.10632 | C386 | 0.43775 | 0.90042 | 0.93011 |
| H63 | 0.30625 | 0.09574 | 0.28009 | H387 | 0.43309 | 0.89901 | 0.86408 |
| H64 | 0.26831 | 0.01025 | 0.09260 | B388 | 0.35612 | 0.87296 | 1.01334 |
| H65 | 0.24006 | 0.03621 | 0.10694 | H389 | 0.36286 | 0.89056 | 1.06915 |
| H66 | 0.33437 | 0.06951 | 0.26732 | B390 | 0.36500 | 0.88442 | 0.91549 |
| H67 | 0.36303 | 0.05726 | 0.17444 | H391 | 0.37850 | 0.91053 | 0.89846 |
| H68 | 0.05659 | 0.37182 | 0.55004 | B392 | 0.37145 | 0.85989 | 0.86566 |
| H69 | 0.03828 | 0.28829 | 0.66920 | H393 | 0.38892 | 0.86715 | 0.80965 |
| H70 | 0.05266 | 0.25397 | 0.61539 | B394 | 0.36711 | 0.83367 | 0.93307 |
| H71 | 0.05362 | 0.32920 | 0.42430 | H395 | 0.38228 | 0.82225 | 0.93031 |
| H72 | 0.06375 | 0.29003 | 0.37052 | B396 | 0.35739 | 0.84148 | 1.02406 |
| N73 | 0.25537 | 0.08442 | 0.21015 | H397 | 0.36482 | 0.83510 | 1.08777 |

|     |         |         |         |      |         |         |         |
|-----|---------|---------|---------|------|---------|---------|---------|
| C74 | 0.31610 | 0.96931 | 0.17139 | C398 | 0.18476 | 0.76938 | 0.85328 |
| C75 | 0.30163 | 0.98637 | 0.16951 | C399 | 0.50748 | 0.93382 | 1.06424 |
| C76 | 0.29829 | 0.93583 | 0.17514 | C400 | 0.31426 | 0.83130 | 0.91499 |
| C77 | 0.31412 | 0.06233 | 0.23078 | C401 | 0.28060 | 0.81360 | 0.89341 |
| C78 | 0.29829 | 0.07779 | 0.23996 | C402 | 0.26134 | 0.78485 | 0.92793 |
| C79 | 0.27145 | 0.06859 | 0.19618 | H403 | 0.26989 | 0.77369 | 0.96708 |
| C80 | 0.26075 | 0.04378 | 0.14169 | C404 | 0.23025 | 0.77019 | 0.91475 |
| C81 | 0.27656 | 0.02827 | 0.13250 | C405 | 0.21751 | 0.78373 | 0.86615 |
| N82 | 0.84603 | 0.26355 | 0.45356 | C406 | 0.23629 | 0.81195 | 0.83047 |
| C83 | 0.96894 | 0.31251 | 0.55297 | C407 | 0.26736 | 0.82676 | 0.84405 |
| C84 | 0.97949 | 0.34338 | 0.54711 | H408 | 0.28080 | 0.84898 | 0.81753 |
| C85 | 0.93092 | 0.29084 | 0.43971 | B409 | 0.33913 | 0.82651 | 0.86471 |
| C86 | 0.87697 | 0.27513 | 0.47651 | H410 | 0.33214 | 0.80885 | 0.80903 |
| C87 | 0.88572 | 0.28507 | 0.55848 | B411 | 0.33075 | 0.81525 | 0.96252 |
| C88 | 0.91480 | 0.29444 | 0.58689 | H412 | 0.31844 | 0.78924 | 0.98006 |
| C89 | 0.02147 | 0.39682 | 0.51644 | B413 | 0.32390 | 0.83954 | 1.01209 |
| C90 | 0.04662 | 0.43434 | 0.40126 | H414 | 0.30557 | 0.83136 | 1.06598 |
| C91 | 0.15346 | 0.62516 | 0.27449 | B415 | 0.32857 | 0.86611 | 0.94509 |
| C92 | 0.13583 | 0.59153 | 0.29651 | H416 | 0.31365 | 0.87792 | 0.94917 |
| C93 | 0.14097 | 0.58046 | 0.37188 | B417 | 0.33806 | 0.85806 | 0.85385 |
| H94 | 0.15809 | 0.59501 | 0.41550 | H418 | 0.33073 | 0.86401 | 0.78931 |
| C95 | 0.12364 | 0.55007 | 0.39339 | H419 | 0.48544 | 0.92548 | 0.90799 |
| C96 | 0.10066 | 0.52987 | 0.34034 | H420 | 0.45767 | 0.90903 | 1.16582 |
| C97 | 0.09567 | 0.54028 | 0.26470 | H421 | 0.21617 | 0.74843 | 0.94363 |
| C98 | 0.11295 | 0.57067 | 0.24297 | H422 | 0.22682 | 0.82287 | 0.79333 |
| H99 | 0.10798 | 0.57781 | 0.18445 | H423 | 0.12615 | 0.69384 | 0.96077 |

|      |         |         |         |      |         |         |         |
|------|---------|---------|---------|------|---------|---------|---------|
| B100 | 0.18000 | 0.64955 | 0.33563 | H424 | 0.07875 | 0.73467 | 0.78283 |
| H101 | 0.18771 | 0.64325 | 0.39881 | H425 | 0.13313 | 0.76130 | 0.79190 |
| B102 | 0.18824 | 0.64107 | 0.24330 | H426 | 0.07166 | 0.66736 | 0.95330 |
| H103 | 0.20108 | 0.62718 | 0.23740 | H427 | 0.03083 | 0.63962 | 0.85919 |
| B104 | 0.16114 | 0.63566 | 0.17731 | H428 | 0.65017 | 0.94601 | 1.25409 |
| H105 | 0.15408 | 0.61793 | 0.12181 | H429 | 0.58244 | 0.96409 | 1.35346 |
| B106 | 0.13588 | 0.64036 | 0.22920 | H430 | 0.53410 | 0.95027 | 1.29655 |
| H107 | 0.10975 | 0.62615 | 0.21285 | H431 | 0.61556 | 0.96725 | 1.10312 |
| B108 | 0.14744 | 0.64870 | 0.32715 | H432 | 0.56625 | 0.95629 | 1.04818 |
| H109 | 0.12996 | 0.64047 | 0.38359 | N433 | 0.83057 | 0.41007 | 1.55325 |
| C110 | 0.25662 | 0.82195 | 0.16656 | C434 | 0.65477 | 0.34913 | 1.53024 |
| C111 | 0.08145 | 0.49796 | 0.36256 | C435 | 0.68640 | 0.36404 | 1.52959 |
| C112 | 0.18749 | 0.69252 | 0.22944 | C436 | 0.63868 | 0.36637 | 1.53811 |
| C113 | 0.20482 | 0.72630 | 0.20928 | C437 | 0.74977 | 0.35251 | 1.58199 |
| C114 | 0.19435 | 0.74558 | 0.23724 | C438 | 0.78115 | 0.36791 | 1.58792 |
| H115 | 0.17378 | 0.73718 | 0.27265 | C439 | 0.79849 | 0.39465 | 1.54347 |
| C116 | 0.21075 | 0.77652 | 0.22226 | C440 | 0.78398 | 0.40581 | 1.49208 |
| C117 | 0.23833 | 0.78923 | 0.17982 | C441 | 0.75256 | 0.39042 | 1.48614 |
| C118 | 0.24911 | 0.77053 | 0.15193 | N442 | 0.41557 | 0.82020 | 1.78256 |
| C119 | 0.23266 | 0.73948 | 0.16645 | C443 | 0.34441 | 0.69965 | 1.89331 |
| H120 | 0.24231 | 0.72608 | 0.14574 | C444 | 0.36626 | 0.69111 | 1.88325 |
| B121 | 0.16119 | 0.66848 | 0.16812 | C445 | 0.35120 | 0.73773 | 1.78811 |
| H122 | 0.15464 | 0.67637 | 0.10544 | C446 | 0.39532 | 0.79017 | 1.81112 |
| B123 | 0.15252 | 0.67629 | 0.26078 | C447 | 0.40098 | 0.78143 | 1.88844 |
| H124 | 0.13856 | 0.68901 | 0.26679 | C448 | 0.38092 | 0.75383 | 1.92451 |
| B125 | 0.17985 | 0.68209 | 0.32636 | C449 | 0.38081 | 0.65080 | 1.85751 |

|      |         |         |         |      |         |         |         |
|------|---------|---------|---------|------|---------|---------|---------|
| H126 | 0.18718 | 0.70006 | 0.38135 | C450 | 0.38965 | 0.61890 | 1.75358 |
| B127 | 0.20513 | 0.67739 | 0.27446 | C451 | 0.46820 | 0.50605 | 1.65171 |
| H128 | 0.23124 | 0.69186 | 0.29089 | C452 | 0.45199 | 0.52356 | 1.67246 |
| B129 | 0.19348 | 0.66876 | 0.17673 | C453 | 0.45148 | 0.53297 | 1.75519 |
| H130 | 0.21057 | 0.67616 | 0.11960 | H454 | 0.46174 | 0.52733 | 1.80583 |
| H131 | 0.07806 | 0.52492 | 0.22278 | C455 | 0.43793 | 0.55007 | 1.77405 |
| H132 | 0.12811 | 0.54247 | 0.45198 | C456 | 0.42436 | 0.55808 | 1.71077 |
| H133 | 0.20199 | 0.79052 | 0.24514 | C457 | 0.42387 | 0.54820 | 1.62916 |
| H134 | 0.27064 | 0.78001 | 0.12041 | C458 | 0.43732 | 0.53104 | 1.61014 |
| H135 | 0.23659 | 0.87965 | 0.26549 | H459 | 0.43614 | 0.52394 | 1.54619 |
| H136 | 0.32702 | 0.92808 | 0.09637 | B460 | 0.46469 | 0.47947 | 1.71431 |
| H137 | 0.30013 | 0.87388 | 0.10683 | H461 | 0.44962 | 0.47308 | 1.77576 |
| H138 | 0.26394 | 0.93412 | 0.25805 | B462 | 0.44912 | 0.47129 | 1.62055 |
| H139 | 0.27860 | 0.97575 | 0.16847 | H463 | 0.42249 | 0.45893 | 1.61208 |
| H140 | 0.96367 | 0.35128 | 0.53734 | B464 | 0.47200 | 0.49809 | 1.55530 |
| H141 | 0.04522 | 0.41570 | 0.63534 | H465 | 0.46296 | 0.50519 | 1.49620 |
| H142 | 0.07946 | 0.46509 | 0.58409 | B466 | 0.50142 | 0.52308 | 1.60902 |
| H143 | 0.01115 | 0.38855 | 0.38400 | H467 | 0.51365 | 0.54919 | 1.59221 |
| H144 | 0.04634 | 0.44002 | 0.33626 | B468 | 0.49712 | 0.51156 | 1.70718 |
| N145 | 0.24871 | 0.84032 | 0.19768 | H469 | 0.50665 | 0.52920 | 1.76314 |
| C146 | 0.36570 | 0.01760 | 0.17351 | C470 | 0.56485 | 0.40595 | 1.54112 |
| C147 | 0.34765 | 0.98426 | 0.17250 | C471 | 0.41110 | 0.57720 | 1.72717 |
| C148 | 0.39905 | 0.03299 | 0.18012 | C472 | 0.50082 | 0.47082 | 1.61312 |
| C149 | 0.27182 | 0.92125 | 0.22339 | C473 | 0.51736 | 0.45343 | 1.59528 |
| C150 | 0.25566 | 0.88986 | 0.22947 | C474 | 0.54462 | 0.46106 | 1.63664 |
| C151 | 0.26561 | 0.87242 | 0.18803 | H475 | 0.55402 | 0.47874 | 1.68302 |

|      |         |         |         |      |         |         |         |
|------|---------|---------|---------|------|---------|---------|---------|
| C152 | 0.29194 | 0.88681 | 0.13937 | C476 | 0.56028 | 0.44590 | 1.61923 |
| C153 | 0.30805 | 0.91819 | 0.13276 | C477 | 0.54898 | 0.42245 | 1.56057 |
| N154 | 0.07138 | 0.25060 | 0.46670 | C478 | 0.52172 | 0.41417 | 1.52048 |
| C155 | 0.02298 | 0.32409 | 0.58270 | C479 | 0.50600 | 0.42930 | 1.53775 |
| C156 | 0.99046 | 0.30063 | 0.55797 | H480 | 0.48492 | 0.42174 | 1.50573 |
| C157 | 0.04324 | 0.30775 | 0.45999 | B481 | 0.50436 | 0.49728 | 1.55027 |
| C158 | 0.06012 | 0.27000 | 0.49209 | H482 | 0.51943 | 0.50345 | 1.48889 |
| C159 | 0.05188 | 0.26922 | 0.57556 | B483 | 0.51983 | 0.50576 | 1.64396 |
| C160 | 0.04322 | 0.28910 | 0.60689 | H484 | 0.54647 | 0.51880 | 1.65209 |
| C161 | 0.93664 | 0.29022 | 0.53351 | B485 | 0.49710 | 0.47873 | 1.70911 |
| C162 | 0.89807 | 0.27615 | 0.41877 | H486 | 0.50677 | 0.47119 | 1.76609 |
| C163 | 0.70984 | 0.19943 | 0.28386 | B487 | 0.46751 | 0.45377 | 1.65537 |
| C164 | 0.74321 | 0.21680 | 0.30851 | H488 | 0.45524 | 0.42765 | 1.67209 |
| C165 | 0.75186 | 0.21987 | 0.39341 | B489 | 0.47188 | 0.46537 | 1.55733 |
| H166 | 0.73522 | 0.21085 | 0.44268 | H490 | 0.46213 | 0.44834 | 1.50020 |
| C167 | 0.78219 | 0.23429 | 0.41639 | H491 | 0.41319 | 0.55397 | 1.57971 |
| C168 | 0.80474 | 0.24596 | 0.35514 | H492 | 0.43839 | 0.55729 | 1.83791 |
| C169 | 0.79660 | 0.24395 | 0.27105 | H493 | 0.58118 | 0.45252 | 1.65189 |
| C170 | 0.76628 | 0.22985 | 0.24795 | H494 | 0.51251 | 0.39587 | 1.47566 |
| H171 | 0.76125 | 0.22917 | 0.18240 | H495 | 0.64118 | 0.42384 | 1.64537 |
| B172 | 0.68548 | 0.20337 | 0.33944 | H496 | 0.60387 | 0.34001 | 1.45211 |
| H173 | 0.69291 | 0.21973 | 0.39838 | H497 | 0.57539 | 0.36559 | 1.46937 |
| B174 | 0.69387 | 0.21696 | 0.24339 | H498 | 0.66952 | 0.39791 | 1.62969 |
| H175 | 0.70770 | 0.24339 | 0.23079 | H499 | 0.69845 | 0.38709 | 1.53229 |
| B176 | 0.69940 | 0.19328 | 0.18605 | H500 | 0.38962 | 0.70799 | 1.87277 |
| H177 | 0.71633 | 0.20163 | 0.12871 | H501 | 0.38248 | 0.63569 | 1.98507 |

|      |         |         |         |      |         |         |         |
|------|---------|---------|---------|------|---------|---------|---------|
| B178 | 0.69501 | 0.16542 | 0.24705 | H502 | 0.39866 | 0.60087 | 1.94847 |
| H179 | 0.70968 | 0.15360 | 0.23841 | H503 | 0.38006 | 0.65403 | 1.72226 |
| B180 | 0.68618 | 0.17142 | 0.34162 | H504 | 0.39227 | 0.61441 | 1.68899 |
| H181 | 0.69390 | 0.16354 | 0.40211 | N505 | 0.59029 | 0.41283 | 1.57607 |
| C182 | 0.51326 | 0.10271 | 0.17277 | C506 | 0.65333 | 0.30078 | 1.52558 |
| C183 | 0.83675 | 0.25919 | 0.37675 | C507 | 0.63846 | 0.31753 | 1.52752 |
| C184 | 0.64258 | 0.16435 | 0.23820 | C508 | 0.63583 | 0.26736 | 1.52859 |
| C185 | 0.60881 | 0.14725 | 0.21776 | C509 | 0.64930 | 0.39097 | 1.59323 |
| C186 | 0.58937 | 0.11856 | 0.25245 | C510 | 0.63334 | 0.40623 | 1.60409 |
| H187 | 0.59772 | 0.10754 | 0.29286 | C511 | 0.60653 | 0.39726 | 1.56045 |
| C188 | 0.55839 | 0.10372 | 0.23735 | C512 | 0.59601 | 0.37295 | 1.50421 |
| C189 | 0.54591 | 0.11715 | 0.18730 | C513 | 0.61196 | 0.35767 | 1.49324 |
| C190 | 0.56483 | 0.14542 | 0.15209 | N514 | 0.18056 | 0.59585 | 1.80327 |
| C191 | 0.59580 | 0.16041 | 0.16749 | C515 | 0.30382 | 0.64566 | 1.89550 |
| H192 | 0.60930 | 0.18263 | 0.14114 | C516 | 0.31238 | 0.67620 | 1.89939 |
| B193 | 0.66677 | 0.16028 | 0.18226 | C517 | 0.26538 | 0.62387 | 1.78496 |
| H194 | 0.65909 | 0.14390 | 0.12337 | C518 | 0.21149 | 0.60687 | 1.82532 |
| B195 | 0.65888 | 0.14686 | 0.27830 | C519 | 0.22035 | 0.61504 | 1.90827 |
| H196 | 0.64617 | 0.12048 | 0.29095 | C520 | 0.24947 | 0.62378 | 1.93527 |
| B197 | 0.65291 | 0.17032 | 0.33536 | C521 | 0.35194 | 0.73174 | 1.88171 |
| H198 | 0.63495 | 0.16127 | 0.39022 | C522 | 0.37006 | 0.77018 | 1.76418 |
| B199 | 0.65758 | 0.19847 | 0.27468 | C523 | 0.48830 | 0.95668 | 1.61833 |
| H200 | 0.64305 | 0.21049 | 0.28456 | C524 | 0.47012 | 0.92306 | 1.63976 |
| B201 | 0.66629 | 0.19230 | 0.18000 | C525 | 0.47750 | 0.91094 | 1.70909 |
| H202 | 0.65899 | 0.20005 | 0.11852 | H526 | 0.49720 | 0.92444 | 1.74664 |
| H203 | 0.81377 | 0.25312 | 0.22296 | C527 | 0.45908 | 0.88091 | 1.73257 |

|      |         |         |         |      |         |         |         |
|------|---------|---------|---------|------|---------|---------|---------|
| H204 | 0.78794 | 0.23576 | 0.48199 | C528 | 0.43295 | 0.86213 | 1.68700 |
| H205 | 0.54421 | 0.08188 | 0.26565 | C529 | 0.42613 | 0.87335 | 1.61591 |
| H206 | 0.55552 | 0.15620 | 0.11368 | C530 | 0.44448 | 0.90336 | 1.59227 |
| H207 | 0.45374 | 0.02692 | 0.27781 | H531 | 0.43812 | 0.91117 | 1.53736 |
| H208 | 0.40800 | 0.06892 | 0.09780 | B532 | 0.51569 | 0.98040 | 1.67847 |
| H209 | 0.46226 | 0.09534 | 0.11021 | H533 | 0.52335 | 0.97356 | 1.74083 |
| H210 | 0.39932 | 0.00060 | 0.26685 | B534 | 0.52275 | 0.97173 | 1.58483 |
| H211 | 0.35853 | 0.97209 | 0.17408 | H535 | 0.53483 | 0.95719 | 1.57679 |
| H212 | 0.98170 | 0.28139 | 0.60222 | B536 | 0.49536 | 0.96726 | 1.52120 |
| H213 | 0.92018 | 0.30119 | 0.64779 | H537 | 0.48719 | 0.94946 | 1.46557 |
| H214 | 0.87039 | 0.28532 | 0.59909 | B538 | 0.47119 | 0.97288 | 1.57575 |
| H215 | 0.94142 | 0.27970 | 0.40489 | H539 | 0.44490 | 0.95961 | 1.56115 |
| H216 | 0.89138 | 0.26839 | 0.35530 | B540 | 0.48361 | 0.98067 | 1.67307 |
| N217 | 0.16611 | 0.74394 | 0.88819 | H541 | 0.46662 | 0.97275 | 1.73062 |
| C218 | 0.98861 | 0.68459 | 0.85941 | C542 | 0.59314 | 0.15339 | 1.51150 |
| C219 | 0.02201 | 0.70005 | 0.86045 | C543 | 0.41199 | 0.83108 | 1.71324 |
| C220 | 0.97269 | 0.70212 | 0.86545 | C544 | 0.52363 | 0.02406 | 1.57437 |
| C221 | 0.08480 | 0.68761 | 0.91682 | C545 | 0.54133 | 0.05787 | 1.55508 |
| C222 | 0.11619 | 0.70247 | 0.92287 | C546 | 0.53326 | 0.07773 | 1.59288 |
| C223 | 0.13399 | 0.72914 | 0.87857 | H547 | 0.51455 | 0.06970 | 1.63578 |
| C224 | 0.11991 | 0.74076 | 0.82715 | C548 | 0.54968 | 0.10862 | 1.57794 |
| C225 | 0.08847 | 0.72589 | 0.82102 | C549 | 0.57495 | 0.12074 | 1.52554 |
| N226 | 0.74228 | 0.15153 | 1.09634 | C550 | 0.58348 | 0.10148 | 1.48809 |
| C227 | 0.67141 | 0.03079 | 1.21243 | C551 | 0.56695 | 0.07044 | 1.50266 |
| C228 | 0.68627 | 0.01802 | 1.17073 | H552 | 0.57482 | 0.05659 | 1.47391 |
| C229 | 0.67646 | 0.06958 | 1.10892 | B553 | 0.49650 | 0.00067 | 1.51404 |



|      |         |         |         |      |         |          |         |
|------|---------|---------|---------|------|---------|----------|---------|
| C230 | 0.72269 | 0.12128 | 1.12464 | H554 | 0.48981 | 0.00904  | 1.45253 |
| C231 | 0.73143 | 0.11137 | 1.19480 | B555 | 0.48904 | 0.00872  | 1.60798 |
| C232 | 0.71248 | 0.08357 | 1.23164 | H556 | 0.47602 | 0.02234  | 1.61590 |
| C233 | 0.69920 | 0.97627 | 1.15170 | B557 | 0.51659 | 0.01347  | 1.67133 |
| C234 | 0.69928 | 0.93398 | 1.07205 | H558 | 0.52484 | 0.03131  | 1.72685 |
| C235 | 0.79969 | 0.84024 | 0.97313 | B559 | 0.54085 | 0.00802  | 1.61660 |
| C236 | 0.78177 | 0.85620 | 0.99300 | H560 | 0.56713 | 0.02185  | 1.63129 |
| C237 | 0.78619 | 0.87231 | 1.06827 | B561 | 0.52828 | -0.00018 | 1.51954 |
| H238 | 0.80201 | 0.87367 | 1.11487 | H562 | 0.54478 | 0.00666  | 1.46119 |
| C239 | 0.77002 | 0.88702 | 1.08539 | H563 | 0.40618 | 0.85901  | 1.57948 |
| C240 | 0.74878 | 0.88591 | 1.02811 | H564 | 0.46504 | 0.87257  | 1.78727 |
| C241 | 0.74361 | 0.86946 | 0.95426 | H565 | 0.54276 | 0.12303  | 1.60851 |
| C242 | 0.75974 | 0.85472 | 0.93695 | H566 | 0.60326 | 0.11050  | 1.44860 |
| H243 | 0.75471 | 0.84205 | 0.87941 | H567 | 0.57600 | 0.21087  | 1.62437 |
| B244 | 0.79647 | 0.81325 | 1.03344 | H568 | 0.66298 | 0.26007  | 1.44235 |
| H245 | 0.78080 | 0.80582 | 1.09382 | H569 | 0.63599 | 0.20570  | 1.45029 |
| B246 | 0.78189 | 0.80586 | 0.93843 | H570 | 0.60334 | 0.26535  | 1.61912 |
| H247 | 0.75533 | 0.79280 | 0.92799 | H571 | 0.61539 | 0.30651  | 1.52866 |
| B248 | 0.80483 | 0.83394 | 0.87640 | H572 | 0.29536 | 0.68286  | 1.89917 |
| H249 | 0.79575 | 0.84185 | 0.81890 | H573 | 0.38528 | 0.74907  | 1.98332 |
| B250 | 0.83334 | 0.85869 | 0.93330 | H574 | 0.41981 | 0.79618  | 1.92131 |
| H251 | 0.84508 | 0.88498 | 0.91932 | H575 | 0.32752 | 0.72892  | 1.76787 |
| B252 | 0.82842 | 0.84584 | 1.03016 | H576 | 0.36546 | 0.77700  | 1.70456 |
| H253 | 0.83751 | 0.86255 | 1.08811 | N577 | 0.58654 | 0.17187  | 1.54824 |
| C254 | 0.89930 | 0.74256 | 0.86423 | C578 | 0.70170 | 0.34770  | 1.52727 |
| C255 | 0.73198 | 0.90187 | 1.04318 | C579 | 0.68496 | 0.31607  | 1.52479 |

|      |         |         |         |      |         |         |         |
|------|---------|---------|---------|------|---------|---------|---------|
| C256 | 0.83448 | 0.80723 | 0.93266 | C580 | 0.73511 | 0.36363 | 1.53124 |
| C257 | 0.85179 | 0.79056 | 0.91412 | C581 | 0.61042 | 0.25260 | 1.58069 |
| C258 | 0.87989 | 0.79945 | 0.95235 | C582 | 0.59431 | 0.22123 | 1.58558 |
| H259 | 0.88977 | 0.81796 | 0.99610 | C583 | 0.60329 | 0.20396 | 1.53916 |
| C260 | 0.89563 | 0.78425 | 0.93595 | C584 | 0.62860 | 0.21853 | 1.48667 |
| C261 | 0.88363 | 0.75951 | 0.88150 | C585 | 0.64470 | 0.24996 | 1.48134 |
| C262 | 0.85570 | 0.75018 | 0.84402 | N586 | 0.40980 | 0.58649 | 1.80155 |
| C263 | 0.83989 | 0.76532 | 0.86033 | C587 | 0.35749 | 0.65902 | 1.88064 |
| H264 | 0.81814 | 0.75675 | 0.83117 | C588 | 0.32717 | 0.63696 | 1.88935 |
| B265 | 0.83781 | 0.83426 | 0.87232 | C589 | 0.37390 | 0.63633 | 1.77054 |
| H266 | 0.85352 | 0.84169 | 0.81204 | C590 | 0.39762 | 0.60581 | 1.81851 |
| B267 | 0.85230 | 0.84177 | 0.96720 | C591 | 0.39386 | 0.61149 | 1.90174 |
| H268 | 0.87883 | 0.85550 | 0.97740 | C592 | 0.38418 | 0.63164 | 1.92315 |
| B269 | 0.82950 | 0.81359 | 1.02914 | C593 | 0.27184 | 0.62207 | 1.87760 |
| H270 | 0.83908 | 0.80572 | 1.08562 | C594 | 0.23250 | 0.60909 | 1.76544 |
| B271 | 0.80080 | 0.78886 | 0.97241 | C595 | 0.04524 | 0.53461 | 1.62892 |
| H272 | 0.78901 | 0.76256 | 0.98646 | C596 | 0.07843 | 0.55209 | 1.65500 |
| B273 | 0.80584 | 0.80173 | 0.87543 | C597 | 0.08661 | 0.55476 | 1.74029 |
| H274 | 0.79726 | 0.78547 | 0.81645 | H598 | 0.06969 | 0.54574 | 1.78887 |
| H275 | 0.72709 | 0.86811 | 0.90957 | C599 | 0.11678 | 0.56852 | 1.76449 |
| H276 | 0.77421 | 0.89932 | 1.14350 | C600 | 0.13960 | 0.58011 | 1.70410 |
| H277 | 0.91710 | 0.79177 | 0.96644 | C601 | 0.13196 | 0.57875 | 1.61980 |
| H278 | 0.84593 | 0.73092 | 0.80243 | C602 | 0.10181 | 0.56515 | 1.59542 |
| H279 | 0.97661 | 0.76162 | 0.96514 | H603 | 0.09715 | 0.56471 | 1.52966 |
| H280 | 0.93688 | 0.67449 | 0.78344 | B604 | 0.02034 | 0.53751 | 1.68491 |
| H281 | 0.90876 | 0.70050 | 0.79826 | H605 | 0.02724 | 0.55337 | 1.74486 |

|      |         |         |         |      |         |         |         |
|------|---------|---------|---------|------|---------|---------|---------|
| H282 | 1.00459 | 0.73522 | 0.95215 | B606 | 0.02885 | 0.55194 | 1.58977 |
| H283 | 0.03412 | 0.72310 | 0.86211 | H607 | 0.04224 | 0.57848 | 1.57888 |
| H284 | 0.70405 | 0.03145 | 1.12669 | B608 | 0.03517 | 0.52916 | 1.53074 |
| H285 | 0.72345 | 0.98329 | 1.27063 | H609 | 0.05234 | 0.53818 | 1.47378 |
| H286 | 0.74306 | 0.95064 | 1.24184 | B610 | 0.03114 | 0.50099 | 1.58973 |
| H287 | 0.67442 | 0.95598 | 1.03735 | H611 | 0.04632 | 0.48983 | 1.57926 |
| H288 | 0.69309 | 0.92045 | 1.01581 | B612 | 0.02177 | 0.50591 | 1.68486 |
| N289 | 0.92502 | 0.74977 | 0.89819 | H613 | 0.02961 | 0.49782 | 1.74468 |
| C290 | 0.98674 | 0.63603 | 0.85810 | C614 | 0.84889 | 0.43531 | 1.51692 |
| C291 | 0.97220 | 0.65303 | 0.85767 | C615 | 0.17143 | 0.59261 | 1.72643 |
| C292 | 0.96907 | 0.60260 | 0.86287 | C616 | 0.97819 | 0.49882 | 1.58147 |
| C293 | 0.98399 | 0.72771 | 0.91705 | C617 | 0.94450 | 0.48123 | 1.56069 |
| C294 | 0.96823 | 0.74329 | 0.92634 | C618 | 0.92534 | 0.45287 | 1.59753 |
| C295 | 0.94095 | 0.73371 | 0.88448 | H619 | 0.93394 | 0.44249 | 1.63958 |
| C296 | 0.92975 | 0.70840 | 0.83169 | C620 | 0.89437 | 0.43762 | 1.58278 |
| C297 | 0.94550 | 0.69282 | 0.82227 | C621 | 0.88159 | 0.45027 | 1.53088 |
| N298 | 0.51554 | 0.93777 | 1.14210 | C622 | 0.90021 | 0.47822 | 1.49359 |
| C299 | 0.63463 | 0.97914 | 1.27506 | C623 | 0.93121 | 0.49363 | 1.50859 |
| C300 | 0.64822 | 0.01356 | 1.27860 | H624 | 0.94447 | 0.51559 | 1.48055 |
| C301 | 0.60213 | 0.97301 | 1.14588 | B625 | 1.00291 | 0.49583 | 1.52495 |
| C302 | 0.54607 | 0.95067 | 1.17065 | H626 | 0.99569 | 0.47996 | 1.46504 |
| C303 | 0.55138 | 0.95428 | 1.25673 | B627 | 0.99494 | 0.48157 | 1.62010 |
| C304 | 0.57955 | 0.96235 | 1.28995 | H628 | 0.98257 | 0.45509 | 1.63091 |
| C305 | 0.68089 | 0.06339 | 1.20012 | B629 | 0.98820 | 0.50417 | 1.67892 |
| C306 | 0.69513 | 0.10221 | 1.08518 | H630 | 0.97009 | 0.49445 | 1.73351 |
| C307 | 0.81317 | 0.29098 | 0.95000 | B631 | 0.99246 | 0.53258 | 1.62005 |

|      |         |         |         |      |         |         |         |
|------|---------|---------|---------|------|---------|---------|---------|
| C308 | 0.79393 | 0.25714 | 0.96853 | H632 | 0.97740 | 0.54399 | 1.63073 |
| C309 | 0.80363 | 0.24291 | 1.02631 | B633 | 1.00171 | 0.52748 | 1.52493 |
| H310 | 0.82538 | 0.25509 | 1.05623 | H634 | 0.99442 | 0.53552 | 1.46402 |
| C311 | 0.78525 | 0.21258 | 1.04726 | H635 | 0.14941 | 0.58790 | 1.57252 |
| C312 | 0.75676 | 0.19551 | 1.01053 | H636 | 0.12217 | 0.56950 | 1.83025 |
| C313 | 0.74742 | 0.20887 | 0.95041 | H637 | 0.88042 | 0.41609 | 1.61297 |
| C314 | 0.76579 | 0.23917 | 0.92910 | H638 | 0.89065 | 0.48844 | 1.45391 |
| H315 | 0.75760 | 0.24832 | 0.88184 | H639 | 0.79144 | 0.35967 | 1.62593 |
| B316 | 0.83945 | 0.31325 | 1.01507 | H640 | 0.74246 | 0.39889 | 1.44821 |
| H317 | 0.84458 | 0.30476 | 1.07883 | H641 | 0.79685 | 0.42645 | 1.45696 |
| B318 | 0.84823 | 0.30512 | 0.92291 | H642 | 0.73693 | 0.33223 | 1.61859 |
| H319 | 0.85955 | 0.28980 | 0.91718 | H643 | 0.69597 | 0.30401 | 1.52399 |
| B320 | 0.82283 | 0.30247 | 0.85439 | H644 | 0.32044 | 0.61334 | 1.88381 |
| H321 | 0.81524 | 0.28515 | 0.79768 | H645 | 0.25478 | 0.62885 | 1.99711 |
| B322 | 0.79836 | 0.30894 | 0.90411 | H646 | 0.20501 | 0.61425 | 1.95078 |
| H323 | 0.77259 | 0.29733 | 0.88436 | H647 | 0.27606 | 0.61369 | 1.74664 |
| B324 | 0.80842 | 0.31519 | 1.00353 | H648 | 0.22573 | 0.60259 | 1.70125 |

**Supplementary Table 5. Experimental (Exp.) and calculated (Cal.) elemental analysis of B-COF.**

| Sample               | C (%) | N (%) | H (%) | B <sup>[b]</sup> (%) |
|----------------------|-------|-------|-------|----------------------|
| Cal <sup>[a]</sup> . | 70.05 | 5.11  | 5.14  | 19.70                |
| Exp.                 | 69.70 | 4.70  | 5.05  | 20.55                |

<sup>[a]</sup> Calculated with the unit of B-COF structure. <sup>[b]</sup> B (%) = 100% - C (%) - N (%) - H (%).

**Supplementary Table 6. Particle deposition energy spectrum of 1- $\mu$ m B-COF sphere.**

| Particles       | Max (keV) | Min (keV) | Average (keV) | Counts |
|-----------------|-----------|-----------|---------------|--------|
| $^7\text{Li}$   | 9.38E+00  | 5.73E-34  | 2.59E+00      | 821    |
| Alpha           | 5.55E+00  | 2.13E-40  | 1.31E+00      | 821    |
| Proton          | 4.41E-01  | 3.71E-20  | 6.72E-03      | 66     |
| $^{12}\text{C}$ | 7.28E-05  | 1.26E-06  | 4.65E-05      | 19     |
| $^{11}\text{B}$ | 6.22E-05  | 7.34E-06  | 3.96E-05      | 6      |
| $^{14}\text{N}$ | 5.48E-05  | 1.19E-05  | 3.15E-05      | 3      |
| $^{14}\text{C}$ | 4.26E+00  | 4.22E+00  | 4.24E+00      | 2      |

**Supplementary Table 7. Percentage of energy deposited and remaining by particles in 1- $\mu\text{m}$  B-COF sphere.**

| Particles     | Deposited energy (%) | Remaining energy (%) |
|---------------|----------------------|----------------------|
| $^7\text{Li}$ | 0.31                 | 99.69                |
| Alpha         | 0.09                 | 99.91                |

**Supplementary Table 8. Particle deposition energy spectrum of 64 1- $\mu$ m B-COF spheres.**

| Particles       | Max (keV) | Min (keV) | Average (keV) | Counts |
|-----------------|-----------|-----------|---------------|--------|
| $^7\text{Li}$   | 1.13E+01  | 1.22E-67  | 3.52E+00      | 12439  |
| Alpha           | 6.44E+00  | 2.35E-134 | 1.88E+00      | 12241  |
| Proton          | 9.23E-01  | 3.85E-07  | 8.84E-03      | 511    |
| $^{12}\text{C}$ | 1.60E-04  | 3.34E-06  | 4.02E-05      | 142    |
| $^{11}\text{B}$ | 1.02E-04  | 2.15E-06  | 4.23E-05      | 42     |
| Deuteron        | 1.32E+00  | 3.78E-36  | 1.41E-01      | 22     |
| $^{14}\text{N}$ | 1.28E-04  | 4.11E-06  | 3.14E-05      | 20     |
| $^{14}\text{C}$ | 4.36E+00  | 1.63E-01  | 2.22E+00      | 8      |
| $^{10}\text{B}$ | 8.20E-05  | 2.96E-06  | 3.78E-05      | 5      |
| Electron        | 9.68E-01  | 2.87E-02  | 3.81E-01      | 4      |
| $^{13}\text{C}$ | 3.13E-05  | 3.21E-06  | 1.73E-05      | 2      |
| Gamma           | 2.65E-02  | 2.65E-02  | 2.65E-02      | 2      |



**Supplementary Table 9. Percentage of energy deposited and remaining by particles in 64 1- $\mu$ m B-COF spheres.**

| Particles       | Deposited energy (%) | Remaining energy (%) |
|-----------------|----------------------|----------------------|
| ${}^7\text{Li}$ | 0.42                 | 99.58                |
| Alpha           | 0.13                 | 99.87                |

**Supplementary Table 10. *P* values in figure 4D, F (two-tailed unpaired Student's *t*-test).**

| Tumors  | Group         | B16F10 Boron capsule+N |         | MC38 Boron capsule+N |         |
|---------|---------------|------------------------|---------|----------------------|---------|
|         |               | <i>P</i> value         | Summary | <i>P</i> value       | Summary |
| primary | PEG-B-COF+N   | 0.0581                 | ns      | 0.8184               | ns      |
|         | Imiquimod+N   | < 0.0001               | ****    | < 0.0001             | ****    |
|         | PBS+N         | < 0.0001               | ****    | < 0.0001             | ****    |
|         | Boron capsule | < 0.0001               | ****    | < 0.0001             | ****    |
|         | PEG-B-COF     | < 0.0001               | ****    | < 0.0001             | ****    |
|         | Imiquimod     | < 0.0001               | ****    | < 0.0001             | ****    |
|         | PBS           | < 0.0001               | ****    | 0.8184               | ns      |

**Supplementary Table 11. P values in figure 5G-K (one-way analysis of variance (ANOVA) followed by Tukey's HSD post hoc test).**

| Group                             | CD4+    |         | CD8+    |         | Foxp3+  |         | M1      |         | M1/M2 ratio |         |
|-----------------------------------|---------|---------|---------|---------|---------|---------|---------|---------|-------------|---------|
|                                   | P Value | Summary | P Value | Summary | P Value | Summary | P Value | Summary | P Value     | Summary |
| PBS vs. PBS+N                     | 0.0003  | ***     | <0.0001 | ****    | 0.9397  | ns      | 0.0100  | **      | 0.8401      | ns      |
| PBS vs. Imiquimod+N               | <0.0001 | ****    | <0.0001 | ****    | 0.871   | ns      | <0.0001 | ****    | 0.0009      | ***     |
| PBS vs. B-COF+N                   | <0.0001 | ****    | <0.0001 | ****    | <0.0001 | ****    | 0.0031  | **      | 0.8177      | ns      |
| PBS vs. Boron capsule+N           | <0.0001 | ****    | <0.0001 | ****    | <0.0001 | ****    | <0.0001 | ****    | <0.0001     | ****    |
| Imiquimod vs. PBS+N               | 0.1491  | ns      | <0.0001 | ****    | 0.9991  | ns      | 0.3502  | ns      | 0.9996      | ns      |
| Imiquimod vs. Imiquimod+N         | 0.0057  | **      | <0.0001 | ****    | 0.5432  | ns      | 0.0002  | ***     | 0.0774      | ns      |
| Imiquimod vs. B-COF+N             | <0.0001 | ****    | <0.0001 | ****    | <0.0001 | ****    | 0.1537  | ns      | 0.9998      | ns      |
| Imiquimod vs. Boron capsule+N     | <0.0001 | ****    | <0.0001 | ****    | <0.0001 | ****    | <0.0001 | ****    | <0.0001     | ****    |
| PEG-B-COF vs. PBS+N               | 0.007   | **      | <0.0001 | ****    | 0.9944  | ns      | 0.0127  | *       | 0.8586      | ns      |
| PEG-B-COF vs. Imiquimod+N         | 0.0002  | ***     | <0.0001 | ****    | 0.0586  | ns      | <0.0001 | ****    | 0.0010      | ***     |
| PEG-B-COF vs. B-COF+N             | <0.0001 | ****    | <0.0001 | ****    | <0.0001 | ****    | 0.0040  | **      | 0.8374      | ns      |
| PEG-B-COF vs. Boron capsule+N     | <0.0001 | ****    | <0.0001 | ****    | <0.0001 | ****    | <0.0001 | ****    | <0.0001     | ****    |
| Boron capsule vs. PBS+N           | 0.2835  | ns      | <0.0001 | ****    | >0.9999 | ns      | 0.1551  | ns      | 0.9999      | ns      |
| Boron capsule vs. Imiquimod+N     | 0.0137  | *       | <0.0001 | ****    | 0.4259  | ns      | <0.0001 | ****    | 0.0656      | ns      |
| Boron capsule vs. B-COF+N         | <0.0001 | ****    | <0.0001 | ****    | <0.0001 | ****    | 0.0581  | ns      | >0.9999     | ns      |
| Boron capsule vs. Boron capsule+N | <0.0001 | ****    | <0.0001 | ****    | <0.0001 | ****    | <0.0001 | ****    | <0.0001     | ****    |
| PBS+N vs. Imiquimod+N             | 0.8087  | ns      | 0.1553  | ns      | 0.2453  | ns      | 0.0524  | ns      | 0.0267      | *       |
| PBS+N vs. B-COF+N                 | <0.0001 | ****    | <0.0001 | ****    | <0.0001 | ****    | 0.9996  | ns      | >0.9999     | ns      |
| PBS+N vs. Boron capsule+N         | <0.0001 | ****    | <0.0001 | ****    | <0.0001 | ****    | 0.0025  | **      | <0.0001     | ****    |
| Imiquimod+N vs. B-COF+N           | <0.0001 | ****    | <0.0001 | ****    | <0.0001 | ****    | 0.1414  | ns      | 0.0297      | *       |
| Imiquimod+N vs. Boron capsule+N   | <0.0001 | ****    | <0.0001 | ****    | <0.0001 | ****    | 0.8851  | ns      | <0.0001     | ****    |
| B-COF+N vs. Boron capsule+N       | <0.0001 | ****    | 0.0017  | **      | >0.9999 | ns      | 0.0080  | **      | <0.0001     | ****    |

**Supplementary Table 12. *P* values in Supplementary Figure 25 (One-way analysis of variance (ANOVA) followed by Tukey's HSD post hoc test).**

| Group                             | CD3+           |         | M2             |         |
|-----------------------------------|----------------|---------|----------------|---------|
|                                   | <i>P</i> Value | Summary | <i>P</i> Value | Summary |
| PBS vs. Imiquimod                 | 0.988          | ns      | 0.0032         | **      |
| PBS vs. PEG-B-COF                 | 0.5999         | ns      | >0.9999        | ns      |
| PBS vs. Boron capsule             | 0.0161         | *       | 0.0015         | **      |
| PBS vs. PBS+N                     | 0.009          | **      | 0.9998         | ns      |
| PBS vs. Imiquimod+N               | <0.0001        | ****    | 0.0121         | *       |
| PBS vs. B-COF+N                   | <0.0001        | ****    | >0.9999        | ns      |
| PBS vs. Boron capsule+N           | <0.0001        | ****    | <0.0001        | ****    |
| Imiquimod vs. PEG-B-COF           | 0.9711         | ns      | 0.0016         | **      |
| Imiquimod vs. Boron capsule       | 0.1023         | ns      | >0.9999        | ns      |
| Imiquimod vs. PBS+N               | 0.0615         | ns      | 0.009          | **      |
| Imiquimod vs. Imiquimod+N         | <0.0001        | ****    | 0.999          | ns      |
| Imiquimod vs. B-COF+N             | <0.0001        | ****    | 0.0047         | **      |
| Imiquimod vs. Boron capsule+N     | <0.0001        | ****    | 0.6368         | ns      |
| PEG-B-COF vs. Boron capsule       | 0.5175         | ns      | 0.0008         | ***     |
| PEG-B-COF vs. PBS+N               | 0.374          | ns      | 0.996          | ns      |
| PEG-B-COF vs. Imiquimod+N         | <0.0001        | ****    | 0.0064         | **      |
| PEG-B-COF vs. B-COF+N             | <0.0001        | ****    | 0.9998         | ns      |
| PEG-B-COF vs. Boron capsule+N     | <0.0001        | ****    | <0.0001        | ****    |
| Boron capsule vs. PBS+N           | >0.9999        | ns      | 0.0044         | **      |
| Boron capsule vs. Imiquimod+N     | 0.0112         | *       | 0.9866         | ns      |
| Boron capsule vs. B-COF+N         | <0.0001        | ****    | 0.0023         | **      |
| Boron capsule vs. Boron capsule+N | <0.0001        | ****    | 0.8099         | ns      |
| PBS+N vs. Imiquimod+N             | 0.0199         | *       | 0.0329         | *       |
| PBS+N vs. B-COF+N                 | <0.0001        | ****    | >0.9999        | ns      |
| PBS+N vs. Boron capsule+N         | <0.0001        | ****    | 0.0001         | ***     |
| Imiquimod+N vs. B-COF+N           | <0.0001        | ****    | 0.0178         | *       |
| Imiquimod+N vs. Boron capsule+N   | <0.0001        | ****    | 0.3112         | ns      |
| B-COF+N vs. Boron capsule+N       | 0.0017         | **      | <0.0001        | ****    |

**Supplementary Table 13. *P* values in figure 6C (One-way analysis of variance (ANOVA) followed by Tukey's HSD post hoc test).**

| Group                             | TNF- $\alpha$  |         | IL-12p70       |         | IL-6           |         |
|-----------------------------------|----------------|---------|----------------|---------|----------------|---------|
|                                   | <i>P</i> Value | Summary | <i>P</i> Value | Summary | <i>P</i> Value | Summary |
| PBS vs. Imiquimod                 | 0.0036         | **      | <0.0001        | ****    | 0.0035         | **      |
| PBS vs. PEG-B-COF                 | >0.9999        | ns      | >0.9999        | ns      | 0.9786         | ns      |
| PBS vs. Boron capsule             | 0.0038         | **      | <0.0001        | ****    | 0.0002         | ***     |
| PBS vs. PBS+N                     | 0.0471         | *       | 0.0306         | *       | 0.2507         | ns      |
| PBS vs. Imiquimod+N               | <0.0001        | ****    | <0.0001        | ****    | <0.0001        | ****    |
| PBS vs. B-COF+N                   | <0.0001        | ****    | <0.0001        | ****    | <0.0001        | ****    |
| PBS vs. Boron capsule+N           | <0.0001        | ****    | <0.0001        | ****    | <0.0001        | ****    |
| Imiquimod vs. PEG-B-COF           | 0.0039         | **      | <0.0001        | ****    | 0.0462         | *       |
| Imiquimod vs. Boron capsule       | >0.9999        | ns      | 0.9968         | ns      | 0.975          | ns      |
| Imiquimod vs. PBS+N               | 0.9785         | ns      | 0.1176         | ns      | 0.6619         | ns      |
| Imiquimod vs. Imiquimod+N         | <0.0001        | ****    | 0.0018         | **      | 0.002          | **      |
| Imiquimod vs. B-COF+N             | <0.0001        | ****    | <0.0001        | ****    | <0.0001        | ****    |
| Imiquimod vs. Boron capsule+N     | <0.0001        | ****    | <0.0001        | ****    | <0.0001        | ****    |
| PEG-B-COF vs. Boron capsule       | 0.0041         | **      | <0.0001        | ****    | 0.0032         | **      |
| PEG-B-COF vs. PBS+N               | 0.0505         | ns      | 0.0321         | *       | 0.8087         | ns      |
| PEG-B-COF vs. Imiquimod+N         | <0.0001        | ****    | <0.0001        | ****    | <0.0001        | ****    |
| PEG-B-COF vs. B-COF+N             | <0.0001        | ****    | <0.0001        | ****    | <0.0001        | ****    |
| PEG-B-COF vs. Boron capsule+N     | <0.0001        | ****    | <0.0001        | ****    | <0.0001        | ****    |
| Boron capsule vs. PBS+N           | 0.9809         | ns      | 0.0223         | *       | 0.1467         | ns      |
| Boron capsule vs. Imiquimod+N     | <0.0001        | ****    | 0.0132         | *       | 0.0307         | *       |
| Boron capsule vs. B-COF+N         | <0.0001        | ****    | <0.0001        | ****    | <0.0001        | ****    |
| Boron capsule vs. Boron capsule+N | <0.0001        | ****    | <0.0001        | ****    | <0.0001        | ****    |
| PBS+N vs. Imiquimod+N             | <0.0001        | ****    | <0.0001        | ****    | <0.0001        | ****    |
| PBS+N vs. B-COF+N                 | <0.0001        | ****    | <0.0001        | ****    | <0.0001        | ****    |
| PBS+N vs. Boron capsule+N         | <0.0001        | ****    | <0.0001        | ****    | <0.0001        | ****    |
| Imiquimod+N vs. B-COF+N           | <0.0001        | ****    | <0.0001        | ****    | <0.0001        | ****    |
| Imiquimod+N vs. Boron capsule+N   | <0.0001        | ****    | <0.0001        | ****    | <0.0001        | ****    |
| B-COF+N vs. Boron capsule+N       | <0.0001        | ****    | <0.0001        | ****    | <0.0001        | ****    |

**Supplementary Table 14. P values in figure 6D-G (One-way analysis of variance (ANOVA) followed by Tukey's HSD post hoc test).**

| Group                             | CD3+    |         | CD4+    |         | CD8+    |         | Foxp3+  |         |
|-----------------------------------|---------|---------|---------|---------|---------|---------|---------|---------|
|                                   | P Value | Summary | P Value | Summary | P Value | Summary | P Value | Summary |
| PBS vs. PBS+N                     | >0.9999 | ns      | 0.725   | ns      | >0.9999 | ns      | 0.9961  | ns      |
| PBS vs. Imiquimod+N               | 0.9995  | ns      | 0.9156  | ns      | 0.9995  | ns      | 0.9996  | ns      |
| PBS vs. B-COF+N                   | <0.0001 | ****    | <0.0001 | ****    | <0.0001 | ****    | 0.7972  | ns      |
| PBS vs. Boron capsule+N           | <0.0001 | ****    | <0.0001 | ****    | <0.0001 | ****    | <0.0001 | ****    |
| Imiquimod vs. PBS+N               | 0.9987  | ns      | 0.7947  | ns      | >0.9999 | ns      | >0.9999 | ns      |
| Imiquimod vs. Imiquimod+N         | >0.9999 | ns      | 0.9503  | ns      | >0.9999 | ns      | 0.9997  | ns      |
| Imiquimod vs. B-COF+N             | <0.0001 | ****    | <0.0001 | ****    | <0.0001 | ****    | 0.2488  | ns      |
| Imiquimod vs. Boron capsule+N     | <0.0001 | ****    | <0.0001 | ****    | <0.0001 | ****    | <0.0001 | ****    |
| PEG-B-COF vs. PBS+N               | >0.9999 | ns      | 0.869   | ns      | >0.9999 | ns      | 0.9999  | ns      |
| PEG-B-COF vs. Imiquimod+N         | 0.9999  | ns      | 0.9781  | ns      | >0.9999 | ns      | >0.9999 | ns      |
| PEG-B-COF vs. B-COF+N             | <0.0001 | ****    | <0.0001 | ****    | <0.0001 | ****    | 0.6253  | ns      |
| PEG-B-COF vs. Boron capsule+N     | <0.0001 | ****    | <0.0001 | ****    | <0.0001 | ****    | <0.0001 | ****    |
| Boron capsule vs. PBS+N           | >0.9999 | ns      | 0.9851  | ns      | >0.9999 | ns      | 0.9997  | ns      |
| Boron capsule vs. Imiquimod+N     | >0.9999 | ns      | 0.9997  | ns      | 0.9999  | ns      | >0.9999 | ns      |
| Boron capsule vs. B-COF+N         | <0.0001 | ****    | <0.0001 | ****    | <0.0001 | ****    | 0.6708  | ns      |
| Boron capsule vs. Boron capsule+N | <0.0001 | ****    | <0.0001 | ****    | <0.0001 | ****    | <0.0001 | ****    |
| PBS+N vs. Imiquimod+N             | 0.9999  | ns      | 0.9999  | ns      | >0.9999 | ns      | >0.9999 | ns      |
| PBS+N vs. B-COF+N                 | <0.0001 | ****    | <0.0001 | ****    | <0.0001 | ****    | 0.3819  | ns      |
| PBS+N vs. Boron capsule+N         | <0.0001 | ****    | <0.0001 | ****    | <0.0001 | ****    | <0.0001 | ****    |
| Imiquimod+N vs. B-COF+N           | <0.0001 | ****    | <0.0001 | ****    | <0.0001 | ****    | 0.4995  | ns      |
| Imiquimod+N vs. Boron capsule+N   | <0.0001 | ****    | <0.0001 | ****    | <0.0001 | ****    | <0.0001 | ****    |
| B-COF+N vs. Boron capsule+N       | 0.0019  | **      | <0.0001 | ****    | <0.0001 | ****    | <0.0001 | ****    |

**Supplementary Table 15. *P* values in figure 6H, J (two-tailed unpaired Student's *t*-test).**

| Tumors  | Group         | B16F10 Boron capsule+N |         | MC38 Boron capsule+N |         |
|---------|---------------|------------------------|---------|----------------------|---------|
|         |               | <i>P</i> value         | Summary | <i>P</i> value       | Summary |
| Distant | PEG-B-COF+N   | < 0.0001               | ****    | 0.0015               | **      |
|         | Imiquimod+N   | < 0.0001               | ****    | < 0.0001             | ****    |
|         | PBS+N         | < 0.0001               | ****    | < 0.0001             | ****    |
|         | Boron capsule | < 0.0001               | ****    | < 0.0001             | ****    |
|         | PEG-B-COF     | < 0.0001               | ****    | < 0.0001             | ****    |
|         | Imiquimod     | < 0.0001               | ****    | < 0.0001             | ****    |
|         | PBS           | < 0.0001               | ****    | < 0.0001             | ****    |
